# Supplementary material for: Effects of e-aid cognitive behavioural therapy for insomnia (eCBTI) to prevent the transition from episodic insomnia to persistent insomnia: study protocol for a randomised controlled trial
Source: PubMed Central journal article supplement — BMJ Open. 2019 Nov 18;9(11):e033457. doi: 10.1136/bmjopen-2019-033457 (PMC6886949; doi:10.1136/bmjopen-2019-033457), 2019-11-18
Supplement: bmjopen-2019-033457.draft_revisions.pdf [file bmjopen-2019-033457.draft_revisions.pdf]

# BMJ Open

BMJ Open is committed to open peer review. As part of this commitment we make the peer review history of every article we publish publicly available.

When an article is published we post the peer reviewers' comments and the authors' responses online. We also post the versions of the paper that were used during peer review. These are the versions that the peer review comments apply to.

The versions of the paper that follow are the versions that were submitted during the peer review process. They are not the versions of record or the final published versions. They should not be cited or distributed as the published version of this manuscript.

BMJ Open is an open access journal and the full, final, typeset and author-corrected version of record of the manuscript is available on our site with no access controls, subscription charges or pay-per-view fees (<http://bmjopen.bmj.com>).

If you have any questions on BMJ Open's open peer review process please email [info.bmjopen@bmj.com](mailto:info.bmjopen@bmj.com)

# BMJ Open

## Effects of E-aid cognitive behavioral therapy for insomnia (eCBTI) to prevent the transition from short-term insomnia to chronic insomnia: study protocol for a randomized controlled trial

|                               |                                                                                                                                                                                                                                                                                                                                                                                                                         |
|-------------------------------|-------------------------------------------------------------------------------------------------------------------------------------------------------------------------------------------------------------------------------------------------------------------------------------------------------------------------------------------------------------------------------------------------------------------------|
| Journal:                      | <i>BMJ Open</i>                                                                                                                                                                                                                                                                                                                                                                                                         |
| Manuscript ID                 | bmjopen-2019-033457                                                                                                                                                                                                                                                                                                                                                                                                     |
| Article Type:                 | Protocol                                                                                                                                                                                                                                                                                                                                                                                                                |
| Date Submitted by the Author: | 06-Aug-2019                                                                                                                                                                                                                                                                                                                                                                                                             |
| Complete List of Authors:     | Yang, Yuan; Southern Medical University Nanfang Hospital, Dept of Psychiatry<br>Luo, Xian; Southern Medical University Nanfang Hospital<br>Paudel , Dharendra; Southern Medical University Nanfang Hospital<br>Zhang, Jihui; The Chinese University of Hong Kong, Department of Psychiatry<br>Li, Shirley Xin ; University of Hong Kong<br>Zhang, Bin; Southern Medical University Nanfang Hospital, Dept of Psychiatry |
| Keywords:                     | E-aid cognitive behavior therapy for insomnia, short-term insomnia disorders, randomized controlled trial                                                                                                                                                                                                                                                                                                               |
|                               |                                                                                                                                                                                                                                                                                                                                                                                                                         |

SCHOLARONE™  
Manuscripts

**STUDY PROTOCOL**

Main text: 2405 words

Abstract: 318 words

Figure: 1

Table: 0

**Effects of E-aid cognitive behavioral therapy for insomnia (eCBTI) to prevent the transition from short-term insomnia to chronic insomnia: study protocol for a randomized controlled trial**Yuan Yang<sup>1,2</sup>, MScXian Luo<sup>1,2</sup>, MD, MScDhirendra Paudel<sup>1,2</sup>, MScJihui Zhang<sup>3</sup>, MD, PhDShirley Xin Li<sup>4,5</sup>, PhD, DCLinPsy, RPSGTBin Zhang<sup>1,2\*</sup>, MD, PhD

1. Department of Psychiatry, Southern Medical University Nanfang Hospital, Guangzhou, China; 2. Guangdong-Hong Kong-Macao Greater Bay Area Center for Brain Science and Brain-Inspired Intelligence, China 3. Department of Psychiatry, Faculty of Medicine, Chinese University of Hong Kong, Shatin, Hong Kong. 4. Department of Psychology, The University of Hong Kong, Hong Kong. 5. The State Key Laboratory of Brain and Cognitive Sciences, The University of Hong Kong, Hong Kong.

Address correspondence to: Prof. Bin Zhang, MD, PhD, Department of Psychiatry, Nanfang Hospital, Southern Medical University, Guangzhou, Guangdong, China; Tel: +86-20-62786731; Email: [zhang73bin@hotmail.com](mailto:zhang73bin@hotmail.com)

## Abstract

**Introduction:** Previous evidence suggested that online self-guided sleep intervention is efficacious in improving treatment outcomes in patients with chronic insomnia. However, the research on online sleep interventions targeting short-term insomnia disorders (STID) has been scarce. This study aims to evaluate the feasibility and effectiveness of brief e-aid cognitive behavioral therapy for insomnia (eCBTI) in treating acute insomnia and preventing transition from short-term insomnia to chronic insomnia.

**Methods and analysis:** This is a pragmatic two-arm multi-center, randomized controlled trial comparing eCBTI with treatment as usual (TAU) in outpatients. Two hundred patients with STID (as defined by DSM-5) will be recruited. Patients will be randomly assigned to receive one-week eCBTI via a Smartphone application, or to receive treatment as usual. Treatment effects will be assessed at 1 week and 3 months after intervention. The primary outcome of the study, whether the eCBTI program is sufficient in preventing transition from short-term to chronic insomnia, is measured by Insomnia Severity Index (ISI). Secondary outcome measurements include Dysfunctional Beliefs and Attitudes about Sleep (DBAS), Ford Insomnia Response to Stress Test (FIRST), Sleep Hygiene and Practices Scale (SHPS), Pre-sleep Arousal Scale (PSAS), and Epworth Sleepiness Scale (ESS). Additionally, Hospital Anxiety and Depression Scale (HADS) and the Short-Form 12-Item Health Survey (SF-12) will be used for the measurement of mood symptoms and quality of life.

**Discussion:** This study will be the first one in China to investigate whether a brief eCBTI program is sufficient to treat acute insomnia and to prevent its transition to chronic insomnia by using a widely-used smartphone application. The findings may also help to understand the key hypothesis that STID is a contributory causal factor or a part of the natural course in the development of chronic insomnia.

**Ethics and dissemination:** The ethical approval for the study has been obtained from Ethics Committee of Southern Medical University (reference number: NFEC-2017-131). The results of the investigation will be published in scientific papers.

**Trial registration:** NCT03302455 (clinicaltrials.gov). Date of registration: October 5, 2017.

**Keywords:** E-aid cognitive behavior therapy for insomnia (eCBTI), short-term insomnia disorders (STID), randomized controlled trial (RCT).

### Article Summary (Strengths and limitations)

- E-aid cognitive behavior therapy for insomnia (eCBTI) is more efficient, flexible, and time-saving compared to traditional face-to-face CBTI.
- This study will investigate the feasibility and effectiveness of short-term eCBTI in treating acute insomnia and preventing transition to chronic insomnia in detail.
- Two hundred participants with Short-term Insomnia Disorders will be randomly divided into eCBTI group (1-week online core treatment) or control group (treatment as usual).
- Participants' insomnia symptoms, anxiety, depression, and quality of life will be assessed by standardized questionnaires pre- and post-intervention.
- Double-blinded study design is unable to be fulfilled in the current study, only the onsite-research staff were blinded to the group assignment.

## Abbreviations

CBT, Cognitive Behavioral Therapy

CI, Confidence Intervals

CID, Chronic Insomnia Disorder

DBAS, Dysfunctional Beliefs and Attitudes about Sleep

DSM-5, Diagnostic and Statistical Manual of Mental Disorders, Fifth Edition

eCBTI, e-aid Cognitive Behavior Therapy for Insomnia

ESS, Epworth Sleepiness Scale

FIRST, Ford Insomnia Response to Stress Test

HADS, Hospital Anxiety and Depression Scale

ISI, Insomnia Severity Index

ITT, Intention to Treat

LOCF, Last Observation Carried Forward

MEQ, Morningness-Eveningness Questionnaire

PP, Per Protocol

PSAS, Pre-sleep Arousal Scale

RCT, Randomized Controlled Trial

SF-12, Short-Form 12-Item Health Survey

SHPS, Sleep Hygiene and Practices Scale

STID, Short-term Insomnia Disorders

TAS, Treatment Adherence Scale

TAU, Treatment as Usual

TSS, Treatment Satisfaction Scale

WMP, WeChat Mini Program

## Background

### *Insomnia disorder*

Insomnia is one of the most common sleep disorders. Most studies reported that 10-15% of adults meet the clinical diagnostic criteria for insomnia disorder [1]. On average, The economic burden of insomnia is 5010 US dollars per person per year, comparing with 421 dollars per year in an individual with good sleep [2]. In addition, indirect consequential impairment caused by insomnia (such as work-related injuries and sickness leave) is significantly greater than direct damage (such as cost of treatment of insomnia). Moreover, insomnia is a prodromal symptom and risk factor for the development and persistence of various physical and mental disorders [3, 4].

Based upon the course of illness, Insomnia is classified as chronic insomnia disorder (CID) (> three months) or short-term insomnia disorder (STID) (< 3 months) [5]. The diagnostic criteria for these two types of insomnia are similar, but CID includes a minimum frequency of 'more than three nights per week' while STID has no such criteria [5]. It is worth mentioning that STID is a common social phenomenon, and most people would have experienced it, especially in response to situational stress or rapid changes in circadian rhythm [6]. STID is often considered as a normal bio-psychological response with no significant impairment, STID attracts less research attention than chronic insomnia [7]. Few longitudinal studies have investigated the natural course of insomnia. In the only two prospective studies conducted by Elis et al. specifically focusing on STID, the annual prevalence of STID was reported to be 36% and about 40% of the STID patients eventually developed chronic insomnia disorder [8, 9]. These two studies showed a high prevalence of STID and a high susceptibility of developing long-term insomnia in those with STID, which indicated that STID could be a key transitional stage in the course of chronic insomnia. The findings suggested a need for developing timely, active intervention to prevent the conversion of STID into chronic insomnia.

Whilst sleep disturbances may gradually improve in some patients once the initial stressors are resolved, a portion of patients with STID may eventually transit to developing chronic insomnia despite the resolution of the environmental stressors [5, 10]. Due to the high recurrence rate of

1  
2  
3 short-term insomnia, patients with STID need to be actively treated. Furthermore, early psycho-  
4 behavioral interventions and/or medication are important to prevent short-term insomnia from  
5 the transition to chronic insomnia.  
6  
7

### 8 9 *Cognitive behavioral therapy for insomnia (CBTI)*

10  
11 Currently, treatment for insomnia includes psycho-behavioral intervention and/or medication.  
12 The psycho-behavioral therapy mostly refers to Cognitive Behavioral Therapy for Insomnia  
13 (CBTI), which is a treatment approach for insomnia with a strong evidence base [11]. CBTI aims  
14 to address the cognitive and behavioral factors that perpetuate insomnia, and consists of a  
15 constellation of treatment components, such as sleep hygiene education, relaxation therapy,  
16 stimulus control, sleep restriction, and cognitive therapy [12, 13]. In addition, CBTI may increase  
17 patients' self-efficacy and confidence to control their sleep problems and is currently suggested  
18 as the first-line treatment of insomnia in adults [14]. However, traditional CBTI program mainly  
19 focuses on the maintenance factors of insomnia, thus, it is mostly applied to treat chronic  
20 insomnia disorder [14]. A study with small sample size (n=40) by Ellis et al. showed that brief  
21 version of CBTI is effective as the treatment of acute insomnia [15]. However, little is known  
22 about whether CBTI can prevent the transition of STID to CID. In addition, the dissemination of  
23 CBTI may be limited due to several obstacles. For example, the treatment procedure is complex,  
24 time-consuming, and costly [16]. It typically requires patients to travel to the hospital/clinic for  
25 face-to-face treatment, which may interfere with patients' routine work. In addition, CBTI is a  
26 specialized treatment approach which should be conducted by trained therapists, there may  
27 be significant variations between different therapists and clinical settings. Without proper  
28 guidance at home, patients may not be able to effectively apply the treatment strategies (e.g.  
29 relaxation, stimulus control, sleep restriction), which in turn might hinder the resolution of  
30 insomnia. Additionally, CBTI requires patients to record their sleep pattern every night. This  
31 task might increase patient's anxiety and aggravate their insomnia symptoms. To address these  
32 challenges, internet-based CBTI has been developed and has been receiving widespread  
33 attention in the recent years, as it makes the delivery of CBTI more efficient and flexible, and  
34 helps to overcome the above shortcomings often associated with face-to-face treatment  
35 modality [17-19]. Several e-aid CBTI (eCBTI) treatment tools have been made available in the  
36  
37  
38  
39  
40  
41  
42  
43  
44  
45  
46  
47  
48  
49  
50  
51  
52  
53  
54  
55  
56  
57



1  
2  
3 western countries (e.g. Sleepio, SHUTi), and have shown similar efficacy as compared to  
4 standard CBTI [18, 20-23]. However, further exploration and verification are still needed to  
5 examine the efficacy of eCBTI as a treatment for STID in Chinese population.  
6  
7

### 8 9 *The current study*

10  
11 In this study, we plan to establish a short-term eCBTI treatment program in Chinese to test  
12 whether eCBTI can reduce the transition from STID to chronic insomnia disorder. Moreover, we  
13 aim to investigate whether this program can improve sleep, anxiety, depression, and quality of  
14 life in individuals with STID.  
15  
16  
17  
18

19  
20  
21 The primary hypothesis for the trial is:

22 The eCBTI intervention can reduce transition of STID to CID;

23 The secondary hypotheses are:

- 24 1. The eCBTI intervention can improve sleep in patients with STID.
  - 25 2. The eCBTI intervention can improve depressive and anxiety symptoms in patients with STID;
  - 26 3. The eCBTI intervention can improve patients' overall health status and quality of life.
- 27  
28  
29  
30  
31  
32  
33  
34  
35  
36  
37  
38  
39  
40  
41  
42  
43  
44  
45  
46  
47  
48  
49  
50  
51  
52  
53  
54  
55  
56  
57  
58  
59  
60

## Methods/Design

### Research design

This study is a parallel assignment, randomized controlled trial to compare eCBTI intervention versus treatment as usual (TAU). The screening, assessments, allocation, and intervention will all be carried out via a WeChat Mini Program (WMP) specially tailored for the trial. An information sheet will be provided online, and informed consent will be completed online before participation in the study. The ethical approval for the study has been obtained from Ethics Committee of Southern Medical University (reference number: NFEC-2017-131). The research design is summarized in Fig. 1.

### Participants

We plan to recruit 200 participants diagnosed with STID according to the sample size estimation. Participants will be recruited from sleep clinics in 31 hospital sites in mainland China, and will be randomly allocated to two groups, namely, eCBTI or control group (TAU). The eCBTI group will receive eCBTI core treatment daily for 1 week in addition to TAU, while the control group will only receive TAU.

### Eligibility criteria

To be included, participants must fulfill the following inclusion criteria:

- A. Meeting the diagnostic criteria for short-term insomnia disorder according to DSM-5,
- B. 18 years of age or older,
- C. being able to comply to the intervention,
- D. Provision of electronic informed consent,
- E. Own and know how to use smart gadgets (such as smartphones, tablets, and computers).

Participants will be excluded if they meet the following exclusion criteria:

- A. Having a diagnosis of a significant untreated mental or medical illness (e.g. consciousness disturbances, mania, acute phase of schizophrenia, major depressive disorder, etc.),
- B. Have been receiving any kind of psychological treatment for insomnia in the past 6 months,
- C. Shift workers, frequent night shift workers, frequent cross-time fliers (e.g. international flight crew, shifted nurse/health professionals),

1  
2  
3 To allow for greater generalizability, this study does not exclude patients with a stable condition  
4 of somatic disease, mental disorders (e.g. depression in remission), and sleep disorders, or  
5 individuals receiving pharmacological treatments (e.g. antihypertensive drugs, antidepressants,  
6 and benzodiazepines).  
7  
8  
9

### 10 11 **Randomization**

12 This study is a randomized controlled trial. Participants fulfilling the study criteria will be  
13 randomly allocated to either eCBTI or Control group using simple randomization [24]. An  
14 independent researcher will implement randomization and treatment allocation, which will be  
15 conducted through an online system.  
16  
17  
18  
19

### 20 21 **Blinding**

22 Onsite-research staff will be blinded to the group assignment. The researcher who carries out  
23 the randomization procedure will be blinded to the study protocol.  
24  
25  
26  
27

### 28 29 **Assessment points**

30 Assessments will be conducted at week 0 (baseline), week 2 (one week post treatment), and  
31 week 12 (3-month after intervention). In consideration of ethical matters, participants in the  
32 control group will be offered eCBTI at week 12.  
33  
34  
35

### 36 37 **Planned intervention**

38 After baseline assessment, participants will be randomly assigned to receive one-week eCBTI or  
39 to receive treatment as usual. E-CBTI will be delivered using the WeChat Mini Program. The  
40 program and all tools can be accessed using the WeChat app of any smartphone. Participants in  
41 the eCBTI group will receive the core sessions daily for one week. Participants will be provided  
42 with individualized treatment with the behavioral components (e.g. stimulus control, sleep  
43 restriction) according to their sleep pattern in the past 2 weeks prior to the treatment session),  
44 as well as the cognitive components (e.g. cognitive restructuring, paradoxical intention).  
45 Treatment elements also include daily sleep diary, relaxation audios (e.g. body scan, breathing  
46 exercise), and sleep hygiene education. The treatment content is designed based on the  
47 guidelines for CBTI [12, 25, 26].  
48  
49  
50  
51  
52  
53  
54  
55  
56  
57

### **Assessment of safety**

CBTI is a cognitive behavioral therapy and its risk of severe adverse events is low. Previous studies indicated that online CBTI is rather safe and did not report any adverse outcomes [27]. In the current study, participant's insomnia severity will be monitored by subjective measurements during treatment and at a 3-month follow up. Participants will be allowed to attend their usual clinical follow-up in the clinic and concurrently receive routine treatments for their clinical conditions, where needed. Any participant who reports worse insomnia symptoms after the completion of intervention will be introduced to receive standard treatment for insomnia (medication and/or non-pharmaceutical treatment).

### **Outcome measures**

Participants will receive a WeChat notification to complete the assessments online. At all times, all the assessment will be consistent across participants. If participants do not complete the questionnaire within two days, they will receive a reminder message. At baseline, demographics and related clinical data will be collected. Descriptive data on lifestyle practices such as tea and coffee consumption, smoking, and alcohol use will also be recorded.

### **Primary outcome measures**

The Change in insomnia symptoms will be measured by the insomnia severity index (ISI) [28, 29], which assesses the severity, nature, and impact of insomnia. It is a 7-item self-report measure, ranging from 0 (no problem) to 4 (very severe problem). The resulting sum score of the ISI ranges from 0 to 28. This outcome will be measured again at week 2 (one week after treatment is complete) and week 12 (three month follow-up) in both eCBTI and Control groups.

Another primary outcome measure is the Ford Insomnia Response to Stress Test (FIRST) [30], a measure to identify sleep disturbance and predisposition to chronic insomnia. Scores on this nine-item self-report questionnaire range from 9 to 36.

### **Secondary outcome measures**

Subjects' general sleep hygiene and practices will be measured with Sleep Hygiene and Practices Scale (SHPS) [31]. Dysfunctional Beliefs and Attitudes about Sleep Scale (DBAS) [32] will be used to measure sleep-related beliefs, potential treatments, expectations, and attitudes

1  
2  
3 towards causes. Problems of sleep initiation will be assessed with the Pre-Sleep Arousal Scale  
4 (PSAS) [33]. We will also assess patient's chronotype using the 5-item Morningness-Eveningness  
5 Questionnaire (MEQ-5) [34], generic health outcomes from the patient's perspective using the  
6 12-Item Short Form Health Survey(SF-12) [35, 36], and anxiety and depression level using the  
7 Hospital Anxiety and Depression Scale (HADS) [37]. Participants in the treatment group will be  
8 also asked to complete a self-reported questionnaire to assess their treatment adherence and  
9 perceived helpfulness using Treatment Adherence Scale (TAS) [38]. Participants' satisfaction  
10 with the treatment will be measured using Treatment Satisfaction Scale (TSS) [39].  
11  
12  
13  
14  
15  
16  
17  
18

### 19 **Sample size estimation**

20 Previous studies have indicated that approximately 40% of STID patients transits to chronic  
21 insomnia disorders [8, 9]. Based on our previous clinical experience, we anticipate that more  
22 than 70% of the subjects will have been retained at 12-week follow-up. In order to meet the  
23 95% confidence intervals (CI) with 35%-49% requirement, the current project needs 200 cases  
24 of short-term insomnia disorder. This sample size ensures the statistical effect is greater than  
25 0.8 in continuous data of small sample (Cohen  $d = 0.30$ ), and also ensures that the odds ratio  
26 (OR) of dichotomous variables is greater than 1.50 ( $p > 0.05$ ).  
27  
28  
29  
30  
31  
32  
33

### 34 **Statistical analysis**

35 Intention to treat (ITT) [40] will be used for the main efficacy analysis and per protocol (PP) for  
36 the consistency test. ITT group consists of all participants who have undergone at least one  
37 week of treatment and evaluation. PP group refers to all ITT subjects who have not experienced  
38 significant program deviation or violation. In ITT analysis, last observation carried forward (LOCF)  
39 method will be used to analyze any missing therapeutic data.  
40  
41  
42  
43  
44  
45

46 Mean with standard deviation for continuous variables, and the frequency with a percentage  
47 for categorical variables will be reported. Independent t-test and non-parametric analyses,  
48 where appropriate, will be applied to compare the differences between two groups. Repeated  
49 measurement analysis will be utilized to compare the changes of symptoms (e.g. ISI score)  
50 following treatment and at 3-month follow-up. The clinical outcome of categorical variables will  
51 be computed using survival analysis or Chi Square test, such as the appearance of suicidal  
52  
53  
54  
55  
56  
57  
58  
59  
60

1  
2  
3 ideation (as measured by 'Yes/No' question). Statistical analyses will be conducted using SPSS  
4 Analytics software v.22.0. Alpha will be set as 0.05 for all tests (2 sided).  
5  
6  
7

### 8 **Ethics and Dissemination**

9  
10 The ethical approval for the study has been obtained from Ethics Committee of Southern  
11 Medical University (reference number: NFEC-2017-131). The results of the investigation will be  
12 published in scientific papers. The data from the investigation will be made available online if  
13 necessary.  
14  
15  
16

### 17 **Patient and Public Involvement**

18  
19 Patients or the public WERE NOT involved in the design, or conduct, or reporting, or  
20 dissemination of our research.  
21  
22  
23  
24  
25  
26  
27  
28  
29  
30  
31  
32  
33  
34  
35  
36  
37  
38  
39  
40  
41  
42  
43  
44  
45  
46  
47  
48  
49  
50  
51  
52  
53  
54  
55  
56  
57  
58  
59  
60

## Discussion

STID is a common phenomenon and might be a significant contributory causal factor in the transition from short-term insomnia to chronic insomnia. E-aid CBTI is more efficient, flexible, and time-saving compared to traditional face-to-face CBTI, and may also help to improve an individual's mood disturbance (e.g. anxiety and depressive symptoms) as well as quality of life. The main aim of the current trial is to investigate whether a brief eCBTI programme is effective to treat acute insomnia and to prevent its transition to chronic insomnia. A previous placebo-controlled RCT demonstrated that online CBTI yields an effect size comparable to that of a traditionally delivered face to face therapy [27]. Furthermore, a previous RCT has provided some preliminary support for the efficacy of treating acute insomnia with a test of single-shot CBTI [15]. The study design benefits from being administered online with a smartphone app which is used widely in China, allowing us to recruit adequate research participants and limit researcher bias during the conduct of the study. Nonetheless, the study will test the key hypothesis that STID is a contributory causal factor or natural course in the occurrence of chronic insomnia.

**Trial status**

Recruitment began in October 2017. It is anticipated that recruitment will be complete by October 2019, and that trial results will be available in 2020.

**Funding statement**

This study is funded by the President Foundation of Nanfang Hospital, Southern Medical University (2017L001), Key Item of Guangzhou bureau of education (2019KC106), Innovation Item of Guangdong Provincial Department of Education (2018A043442), and Project of Guangzhou Philosophy and Society Development (2018GZGJ58).

**Authors' contributions**

BZ designed the study. All authors contributed and actively participated to the proposal. All authors endorsed the final manuscript.

**Competing interests**

The authors declare that they have no competing interests.



## References

1. Zhang, B. and Y.K. Wing, *Sex differences in insomnia: a meta-analysis*. Sleep, 2006. **29**(1): p. 85-93.
2. Daley, M., et al., *The Economic Burden of Insomnia: Direct and Indirect Costs for Individuals with Insomnia Syndrome, Insomnia Symptoms, and Good Sleepers*. Sleep, 2009. **32**(1): p. 55-64.
3. Li, S.X., et al., *Prevalence and correlates of frequent nightmares: a community-based 2-phase study*. Sleep, 2010. **33**(6): p. 774-80.
4. Baglioni, C., et al., *Sleep, Depression and Insomnia – A Vicious Circle?* Vol. 10. 2014.
5. American Psychiatric Association, *Diagnostic and Statistical Manual of Mental Disorders, Fifth Edition (DSM-5)*. APA, Washington, DC, 2013.
6. House, P.s.M.P., *Guidelines for diagnosis and treatment of insomnia in People's Republic of China*. 2016, China: People's Medical Publishing House.
7. Ellis, J.G., et al., *Acute insomnia: current conceptualizations and future directions*. Sleep Med Rev, 2012. **16**(1): p. 5-14.
8. Ellis, J.G., et al., *The natural history of insomnia: focus on prevalence and incidence of acute insomnia*. J Psychiatr Res, 2012. **46**(10): p. 1278-85.
9. Ellis, J.G., et al., *The natural history of insomnia: acute insomnia and first-onset depression*. Sleep, 2014. **37**(1): p. 97-106.
10. American Academy of Sleep, M., *International classification of sleep disorders*. 2014.
11. Drerup, M., *Insomnia, Cognitive Behavioral Treatment of*, in *Encyclopedia of the Neurological Sciences*. 2014, Academic Press: Oxford. p. 708-710.
12. House, P.s.M.P., *Cognitive Behavioral Treatment of Insomnia - A Session-by-Session Guide*. 2012, China: People's Medical Publishing House.
13. Sivertsen, B., *Cognitive behavioural therapy for insomnia*. Vol. 2. 2009. 61-34.
14. Smith, M.T., M.I. Huang, and R. Manber, *Cognitive behavior therapy for chronic insomnia occurring within the context of medical and psychiatric disorders*. Clinical Psychology Review, 2005. **25**(5): p. 559-592.
15. Ellis, J.G., T. Cushing, and A. Germain, *Treating Acute Insomnia: A Randomized Controlled Trial of a "Single-Shot" of Cognitive Behavioral Therapy for Insomnia*. Sleep, 2015. **38**(6): p. 971-8.
16. Perils, M.L. and M.T. Smith, *How can we make CBT-I and other BSM services widely available?* Journal of Clinical Sleep Medicine Jcsm Official Publication of the American Academy of Sleep Medicine, 2008. **4**(1): p. 11-3.
17. Espie, C.A., *"Stepped care": A health technology solution for delivering cognitive behavioral therapy as a first line insomnia treatment*. Sleep, 2009. **32**(12): p. 1549.
18. Cheng, S.K. and J. Dizon, *Computerised Cognitive Behavioural Therapy for Insomnia: A Systematic Review and Meta-Analysis*. Psychotherapy & Psychosomatics, 2012. **81**(4): p. 206-216.
19. Ho, F.Y., et al. *Self-Help Cognitive-Behavioral Therapy for Insomnia (CBT-I): A Systematic Review of Randomized Controlled Trials*. in *Nordic Conference*. 2013.
20. van Straten, A. and P. Cuijpers, *Self-help therapy for insomnia: a meta-analysis*. Sleep Med Rev, 2009. **13**(1): p. 61-71.
21. Ritterband, L.M., et al., *Initial evaluation of an Internet intervention to improve the sleep of cancer survivors with insomnia*. Psychooncology, 2012. **21**(7): p. 695-705.
22. Espie, C.A., et al., *Attribution, cognition and psychopathology in persistent insomnia disorder: outcome and mediation analysis from a randomized placebo-controlled trial of online cognitive behavioural therapy*. Sleep Med, 2014. **15**(8): p. 913-7.

23. Espie, C.A., et al., *Digital Cognitive Behavioural Therapy for Insomnia versus sleep hygiene education: the impact of improved sleep on functional health, quality of life and psychological well-being. Study protocol for a randomised controlled trial.* *Trials*, 2016. **17**(1): p. 257.
24. Hewitt, C.E. and D.J. Torgerson, *Is restricted randomisation necessary?* *Bmj*, 2006. **332**(7556): p. 1506-8.
25. Espie, C.A., et al., *The clinical effectiveness of cognitive behaviour therapy for chronic insomnia: implementation and evaluation of a sleep clinic in general medical practice.* *Behaviour Research & Therapy*, 2001. **39**(1): p. 45-60.
26. Espie, C.A., et al., *Randomized clinical effectiveness trial of nurse-administered small-group cognitive behavior therapy for persistent insomnia in general practice.* *Sleep*, 2007. **30**(5): p. 574-584.
27. Espie, C.A., et al., *A randomized, placebo-controlled trial of online cognitive behavioral therapy for chronic insomnia disorder delivered via an automated media-rich web application.* *Sleep*, 2012. **35**(6): p. 769-81.
28. Morin, C.M., et al., *The Insomnia Severity Index: Psychometric Indicators to Detect Insomnia Cases and Evaluate Treatment Response.* *Sleep*, 2011. **34**(5): p. 601-8.
29. Shapour, B.A. and C.K. Gang, *Reliability and Validity of the Chinese Translation of Insomnia Severity Index and Comparison with Pittsburgh Sleep Quality Index.* *Malaysian Journal of Psychiatry*, 2013. **22**(2): p. 1-7.
30. Gao, C.Y., et al., *Initial application of Chinese version of Ford insomnia response to stress test scale.* *Journal of Clinical Psychiatry*, 2014: p. 305-307.
31. Yang, C.M. and S.S. Lin, *Maladaptive sleep hygiene practices in good sleepers and patients with insomnia.* *Journal of Health Psychology*, 2010. **15**(1): p. 147-155.
32. Espie, C.A., et al., *Insomniacs' attributions. psychometric properties of the Dysfunctional Beliefs and Attitudes about Sleep Scale and the Sleep Disturbance Questionnaire.* *Journal of Psychosomatic Research*, 2000. **48**(2): p. 141-148.
33. Nicassio, P.M., et al., *The phenomenology of the pre-sleep state: the development of the pre-sleep arousal scale.* *Behaviour Research & Therapy*, 1985. **23**(3): p. 263-271.
34. Wei-Xia, L.I., et al., *Validity and reliability of the Chinese version of Morningness/Eveningness Questionnaire-5 items(MEQ-5) in students of technical schools.* *Chinese Mental Health Journal*, 2016. **30**(6): p. 406-412.
35. Jr, W.J., M. Kosinski, and S.D. Keller, *A 12-Item Short-Form Health Survey: construction of scales and preliminary tests of reliability and validity.* *Medical Care*, 1996. **34**(3): p. 220-233.
36. Shou, J., et al., *Reliability and validity of 12-item Short-Form health survey (SF-12) for the health status of Chinese community elderly population in Xujiahui district of Shanghai.* *Aging Clinical & Experimental Research*, 2016. **28**(2): p. 339-346.
37. Zigmond, A.S. and R.P. Snaith, *The hospital anxiety and depression scale.* *Acta Psychiatr Scand*, 1983. **67**(6): p. 361-70.
38. Milosevic, I., et al., *The Treatment Acceptability/Adherence Scale: Moving Beyond the Assessment of Treatment Effectiveness.* *Cogn Behav Ther*, 2015. **44**(6): p. 456-69.
39. DiBenedetti, D.B., et al., *The treatment satisfaction scale: a multidimensional instrument for the assessment of treatment satisfaction for erectile dysfunction patients and their partners.* *Eur Urol*, 2005. **48**(3): p. 503-11.
40. Alshurafa, M., et al., *Inconsistent definitions for intention-to-treat in relation to missing outcome data: systematic review of the methods literature.* *PLoS One*, 2012. **7**(11): p. e49163.

1  
2  
3  
4  
5  
6  
7  
8  
9  
10  
11  
12  
13  
14  
15  
16  
17  
18  
19  
20  
21  
22  
23  
24  
25  
26  
27  
28  
29  
30  
31  
32  
33  
34  
35  
36  
37  
38  
39  
40  
41  
42  
43  
44  
45  
46  
47  
48  
49  
50  
51  
52  
53  
54  
55  
56  
57  
58  
59  
60

**Figure legend**  
**Figure 1 Recruitment Flowchart**

For peer review only

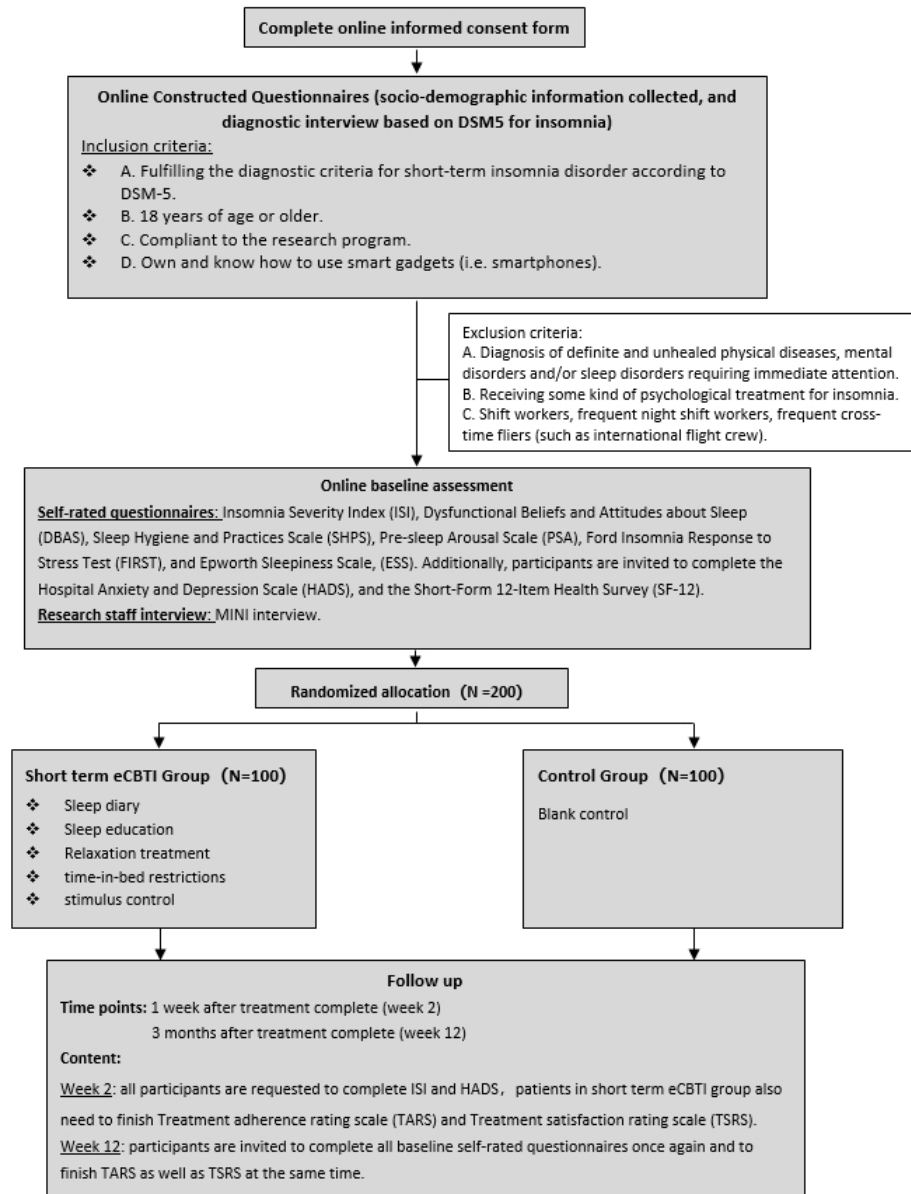

Flowchart

# BMJ Open

## Effects of E-aid cognitive behavioral therapy for insomnia (eCBTI) to prevent the transition from episodic insomnia to persistent insomnia: study protocol for a randomized controlled trial

|                                 |                                                                                                                                                                                                                                                                                                                                                                                                                         |
|---------------------------------|-------------------------------------------------------------------------------------------------------------------------------------------------------------------------------------------------------------------------------------------------------------------------------------------------------------------------------------------------------------------------------------------------------------------------|
| Journal:                        | <i>BMJ Open</i>                                                                                                                                                                                                                                                                                                                                                                                                         |
| Manuscript ID                   | bmjopen-2019-033457.R1                                                                                                                                                                                                                                                                                                                                                                                                  |
| Article Type:                   | Protocol                                                                                                                                                                                                                                                                                                                                                                                                                |
| Date Submitted by the Author:   | 11-Oct-2019                                                                                                                                                                                                                                                                                                                                                                                                             |
| Complete List of Authors:       | Yang, Yuan; Southern Medical University Nanfang Hospital, Dept of Psychiatry<br>Luo, Xian; Southern Medical University Nanfang Hospital<br>Paudel , Dharendra; Southern Medical University Nanfang Hospital<br>Zhang, Jihui; The Chinese University of Hong Kong, Department of Psychiatry<br>Li, Shirley Xin ; University of Hong Kong<br>Zhang, Bin; Southern Medical University Nanfang Hospital, Dept of Psychiatry |
| <b>Primary Subject Heading</b>: | Mental health                                                                                                                                                                                                                                                                                                                                                                                                           |
| Secondary Subject Heading:      | Mental health                                                                                                                                                                                                                                                                                                                                                                                                           |
| Keywords:                       | MENTAL HEALTH, PSYCHIATRY, SLEEP MEDICINE                                                                                                                                                                                                                                                                                                                                                                               |
|                                 |                                                                                                                                                                                                                                                                                                                                                                                                                         |

SCHOLARONE™  
Manuscripts

**STUDY PROTOCOL (Sep 2017, V1)**

Main text: 2405 words

Abstract: 318 words

Figure: 1

Table: 0

**Effects of E-aid cognitive behavioral therapy for insomnia (eCBTI) to prevent the transition from episodic insomnia to persistent insomnia: study protocol for a randomized controlled trial**Yuan Yang<sup>1,2</sup>, MScXian Luo<sup>1,2</sup>, MD, MScDhirendra Paudel<sup>1,2</sup>, MMedJihui Zhang<sup>3</sup>, MD, PhDShirley Xin Li<sup>4,5</sup>, PhD, DCLinPsy, RPSGTBin Zhang<sup>1,2\*</sup>, MD, PhD

1. Department of Psychiatry, Southern Medical University Nanfang Hospital, Guangzhou, China; 2. Guangdong-Hong Kong-Macao Greater Bay Area Center for Brain Science and Brain-Inspired Intelligence, China 3. Department of Psychiatry, Faculty of Medicine, Chinese University of Hong Kong, Shatin, Hong Kong. 4. Department of Psychology, The University of Hong Kong, Hong Kong. 5. The State Key Laboratory of Brain and Cognitive Sciences, The University of Hong Kong, Hong Kong.

Address correspondence to: Prof. Bin Zhang, MD, PhD, Department of Psychiatry, Nanfang Hospital, Southern Medical University, Guangzhou, Guangdong, China; Tel: +86-20-62786731; Email: [zhang73bin@hotmail.com](mailto:zhang73bin@hotmail.com)

## Abstract

**Introduction:** Previous evidence suggested that online self-guided sleep intervention is efficacious in improving treatment outcomes in patients with persistent insomnia. However, the research on online sleep interventions targeting episodic insomnia has been scarce. This study aims to evaluate the effectiveness of brief e-aid cognitive behavioral therapy for insomnia (eCBTI) in preventing transition from episodic insomnia to persistent insomnia.

**Methods and analysis:** This is a pragmatic two-arm multi-center, randomized controlled trial comparing eCBTI with treatment as usual (TAU) in outpatients. Two hundred patients with episodic insomnia (as defined by DSM-5) will be recruited. Patients will be randomly assigned to receive one-week eCBTI via a Smartphone application, or to receive treatment as usual. Treatment effects will be assessed at 1 week and 3 months after intervention. The primary outcome of the study, whether the eCBTI program is sufficient in preventing transition from short-term to persistent insomnia, is measured by Insomnia Severity Index (ISI). Secondary outcome measurements include Dysfunctional Beliefs and Attitudes about Sleep (DBAS), Ford Insomnia Response to Stress Test (FIRST), Sleep Hygiene and Practices Scale (SHPS), Pre-sleep Arousal Scale (PSAS), and Epworth Sleepiness Scale (ESS). Additionally, Hospital Anxiety and Depression Scale (HADS) and the Short-Form 12-Item Health Survey (SF-12) will be used for the measurement of mood symptoms and quality of life.

**Ethics and dissemination:** The ethical approval for the study has been obtained from Ethics Committee of Southern Medical University (reference number: NFEC-2017-131). The results of the investigation will be published in scientific papers.

**Trial registration:** NCT03302455 (clinicaltrials.gov). Date of registration: October 5, 2017.

**Keywords:** E-aid cognitive behavior therapy for insomnia (eCBTI), episodic insomnia, randomized controlled trial (RCT).

### Article Summary (Strengths and limitations)

- This study will investigate the effectiveness of short-term eCBTI in preventing transition from episodic insomnia to persistent insomnia.
- Two hundred participants with episodic insomnia will be randomly divided into eCBTI group (1-week online core treatment) or control group (treatment as usual).
- Participants' insomnia symptoms, anxiety, depression, and quality of life will be assessed.
- Treatment effects will be assessed at 1 week and 3 months after intervention.
- Double-blinded study design is unable to be fulfilled in the current study.



## Abbreviations

CBT, Cognitive Behavioral Therapy

CI, Confidence Intervals

DBAS, Dysfunctional Beliefs and Attitudes about Sleep

DSM-5, Diagnostic and Statistical Manual of Mental Disorders, Fifth Edition

eCBTI, e-aid Cognitive Behavior Therapy for Insomnia

ESS, Epworth Sleepiness Scale

FIRST, Ford Insomnia Response to Stress Test

HADS, Hospital Anxiety and Depression Scale

ISI, Insomnia Severity Index

ITT, Intention to Treat

LOCF, Last Observation Carried Forward

MEQ, Morningness-Eveningness Questionnaire

PP, Per Protocol

PSAS, Pre-sleep Arousal Scale

RCT, Randomized Controlled Trial

SF-12, Short-Form 12-Item Health Survey

SHPS, Sleep Hygiene and Practices Scale

TAS, Treatment Adherence Scale

TAU, Treatment as Usual

TSS, Treatment Satisfaction Scale

WMP, WeChat Mini Program

## Background

### *Insomnia disorder*

Insomnia is one of the most common sleep disorders. Most studies reported that 10-15% of adults meet the clinical diagnostic criteria for insomnia disorder [1]. On average, the economic burden of insomnia is 5010 US dollars per person per year, comparing with 421 dollars per year in an individual with good sleep, according to a study conducted in Quebec, Canada [2]. In addition, indirect consequential impairment caused by insomnia (such as work-related injuries and sickness leave) is significantly greater than direct damage (such as cost of treatment of insomnia). Moreover, insomnia is a prodromal symptom and risk factor for the development and persistence of various physical and mental disorders [3-5].

Based upon the course of illness, Insomnia is classified as 'persistent insomnia' (last three months or longer) or 'episodic insomnia' (last at least one month but less than 3 months) [6]. The diagnostic criteria for these two types of insomnia are similar, but persistent insomnia includes a minimum frequency of 'more than three nights per week' while episodic insomnia has no such criteria [6]. It is worth mentioning that episodic insomnia is a common social phenomenon, and most people would have experienced it, especially in response to situational stress or rapid changes in circadian rhythm [7]. episodic insomnia is often considered as a normal bio-psychological response with no significant impairment, episodic insomnia attracts less research attention than persistent insomnia [8]. Few longitudinal studies have investigated the natural course of insomnia. In the only two prospective studies conducted by Elis et al. specifically focusing on episodic insomnia, the annual prevalence of episodic insomnia was reported to be 36% and about 40% of the episodic insomnia patients eventually developed persistent insomnia [9, 10]. These two studies showed a high prevalence of episodic insomnia and a high susceptibility of developing long-term insomnia in those with episodic insomnia, which indicated that episodic insomnia could be a key transitional stage in the course of persistent insomnia. The findings suggested a need for developing timely, active intervention to prevent the conversion of episodic insomnia into persistent insomnia.

1  
2  
3 Whilst sleep disturbances may gradually improve in some patients once the initial stressors are  
4 resolved, a portion of patients with episodic insomnia may eventually transit to developing  
5 persistent insomnia despite the resolution of the environmental stressors [6, 11]. Due to the  
6 high recurrence rate of episodic insomnia, patients with episodic insomnia need to be actively  
7 treated. Furthermore, early psycho-behavioral interventions and/or medication are important  
8 to prevent episodic insomnia from the transition to persistent insomnia.  
9  
10  
11  
12  
13

### 14 *Cognitive behavioral therapy for insomnia (CBTI)*

15  
16  
17 Currently, treatment for insomnia includes psycho-behavioral intervention and/or medication.  
18 The psycho-behavioral therapy mostly refers to Cognitive Behavioral Therapy for Insomnia  
19 (CBTI), which is a treatment approach for insomnia with a strong evidence base [12]. CBTI aims  
20 to address the cognitive and behavioral factors that perpetuate insomnia, and consists of a  
21 constellation of treatment components, such as sleep hygiene education, relaxation therapy,  
22 stimulus control, sleep restriction, and cognitive therapy [13, 14]. In addition, CBTI may increase  
23 patients' self-efficacy and confidence to control their sleep problems and is currently suggested  
24 as the first-line treatment of insomnia in adults [15]. However, traditional CBTI program mainly  
25 focuses on the maintenance factors of insomnia, thus, it is mostly applied to treat persistent  
26 insomnia [15]. A study with small sample size (n=40) by Ellis et al. showed that brief version of  
27 CBTI is effective as the treatment of acute insomnia [16]. However, little is known about  
28 whether CBTI can prevent the transition of episodic insomnia to persistent insomnia. In  
29 addition, the dissemination of CBTI may be limited due to several obstacles. For example, the  
30 treatment procedure is complex, time-consuming, and costly [17]. It typically requires patients  
31 to travel to the hospital/clinic for face-to-face treatment, which may interfere with patients'  
32 routine work. In addition, CBTI is a specialized treatment approach which should be conducted  
33 by trained therapists, there may be significant variations between different therapists and  
34 clinical settings. Without proper guidance at home, patients may not be able to effectively  
35 apply the treatment strategies (e.g. relaxation, stimulus control, sleep restriction), which in turn  
36 might hinder the resolution of insomnia. Additionally, CBTI requires patients to record their  
37 sleep pattern every night. This task might increase patient's anxiety and aggravate their  
38 insomnia symptoms. To address these challenges, internet-based CBTI has been developed and  
39  
40  
41  
42  
43  
44  
45  
46  
47  
48  
49  
50  
51  
52  
53  
54  
55  
56  
57  
58  
59  
60

1  
2  
3 has been receiving widespread attention in the recent years, as it makes the delivery of CBTI  
4 more efficient and flexible, and helps to overcome the above shortcomings often associated  
5 with face-to-face treatment modality [18-20]. Several e-aid CBTI (eCBTI) treatment tools have  
6 been made available in the western countries (e.g. Sleepio, SHUTi), and have shown similar  
7 efficacy as compared to standard CBTI [19, 21-24]. However, further exploration and  
8 verification are still needed to examine the efficacy of eCBTI as a treatment for episodic  
9 insomnia in Chinese population.  
10  
11  
12  
13  
14  
15

### 16 *The current study*

17  
18  
19 In this study, we plan to establish a short-term eCBTI treatment program in Chinese to test  
20 whether eCBTI can reduce the transition from episodic insomnia to persistent insomnia.  
21 Moreover, we aim to investigate whether this program can improve sleep, anxiety, depression,  
22 and quality of life in individuals with episodic insomnia.  
23  
24  
25  
26  
27  
28

29 The primary hypothesis for the trial is:

30 The eCBTI intervention can reduce transition of episodic insomnia to persistent insomnia;

31 The secondary hypotheses are:

- 32 1. The eCBTI intervention can improve sleep in patients with episodic insomnia.
- 33 2. The eCBTI intervention can improve depressive and anxiety symptoms in patients with  
34 episodic insomnia;
- 35 3. The eCBTI intervention can improve patients' overall health status and quality of life.  
36  
37  
38  
39  
40  
41  
42  
43  
44  
45  
46  
47  
48  
49  
50  
51  
52  
53  
54  
55  
56  
57  
58  
59  
60

## Methods/Design

### Research design

This study is a parallel assignment, randomized controlled trial to compare eCBTI intervention versus treatment as usual (TAU). The screening, assessments, allocation, and intervention will all be carried out via a WeChat Mini Program (WMP) specially tailored for the trial. An information sheet will be provided online, and informed consent will be completed online before participation in the study. The ethical approval for the study has been obtained from Ethics Committee of Southern Medical University (reference number: NFEC-2017-131). The research design is summarized in Fig. 1.

### Participants

We plan to recruit 200 participants diagnosed with episodic insomnia according to the sample size estimation. Participants will be recruited from sleep clinics in 31 hospital sites in mainland China, and will be randomly allocated to two groups at 1:1 ratio, namely, eCBTI (n=100, 50%) or control group (TAU) (n=100, 50%). The eCBTI group will receive eCBTI core treatment daily for 1 week in addition to TAU, while the control group will only receive TAU.

### Eligibility criteria

To be included, participants must fulfill the following inclusion criteria:

- A. Meeting the diagnostic criteria for episodic insomnia according to DSM-5,
- B. 18 years of age or older,
- C. being able to comply to the intervention,
- D. Provision of electronic informed consent,
- E. Own and know how to use smart gadgets (such as smartphones, tablets, and computers).

Participants will be excluded if they meet the following exclusion criteria:

- A. Having a diagnosis of a significant untreated mental or medical illness (e.g. consciousness disturbances, mania, acute phase of schizophrenia, major depressive disorder, etc.),
- B. Have been receiving any kind of psychological treatment for insomnia in the past 6 months,
- C. Shift workers, frequent night shift workers, frequent cross-time fliers (e.g. international flight crew, shifted nurse/health professionals),

1  
2  
3 To allow for greater generalizability, this study does not exclude patients with a stable condition  
4 of somatic disease, mental disorders (e.g. depression in remission), and sleep disorders, or  
5 individuals receiving pharmacological treatments (e.g. antihypertensive drugs, antidepressants,  
6 and benzodiazepines).  
7  
8  
9

### 10 11 **Randomization**

12 This study is a randomized controlled trial. Participants fulfilling the study criteria will be  
13 randomly allocated to either eCBTI or Control group using simple randomization (computer-  
14 generated random numbers) [25]. An independent researcher will implement randomization  
15 and treatment allocation, which will be conducted through an online system.  
16  
17  
18  
19  
20

### 21 **Blinding**

22 Onsite-research staff will be blinded to the group assignment. The researcher who carries out  
23 the randomization procedure will be blinded to the study protocol.  
24  
25  
26  
27

### 28 **Assessment points**

29 Assessments will be conducted at week 0 (baseline), week 2 (one week post treatment), and  
30 week 12 (3-month after intervention). In consideration of ethical matters, participants in the  
31 control group will be offered eCBTI at week 12.  
32  
33  
34  
35

### 36 **Planned intervention**

37 After baseline assessment, participants will be randomly assigned to receive one-week eCBTI or  
38 to receive treatment as usual. E-CBTI will be delivered using the WeChat Mini Program. The  
39 program and all tools can be accessed using the WeChat app of any smartphone. With the  
40 assistance from several professional IT staff and clinical psychologists, the E-CBTI intervention  
41 program has been well-developed and tested before the start of our current study. Participants  
42 in the eCBTI group will receive the core sessions daily for one week. Participants will be  
43 provided with individualized treatment with the behavioral components (e.g. stimulus control,  
44 sleep restriction) according to their sleep pattern in the past 2 weeks prior to the treatment  
45 session), as well as the cognitive components (e.g. cognitive restructuring, paradoxical  
46 intention). Treatment elements also include daily sleep diary, relaxation audios (e.g. body scan,  
47  
48  
49  
50  
51  
52  
53  
54  
55  
56  
57

1  
2  
3 breathing exercise), and sleep hygiene education. The treatment content is designed based on  
4 the guidelines for CBTI [13, 26, 27].  
5  
6

### 7 **Assessment of safety**

8  
9 CBTI is a cognitive behavioral therapy and its risk of severe adverse events is low. Previous  
10 studies indicated that online CBTI is rather safe and did not report any adverse outcomes [28].  
11 In the current study, participant's insomnia severity will be monitored by subjective  
12 measurements during treatment and at a 3-month follow up. Additionally, psychiatrists will be  
13 involved to assess participant's suicidal ideation, professional intervention will be provided to  
14 those in need. Participants will be allowed to attend their usual clinical follow-up in the clinic  
15 and concurrently receive routine treatments for their clinical conditions, where needed. Any  
16 participant who reports worse insomnia symptoms after the completion of intervention will be  
17 introduced to receive standard treatment for insomnia (medication and/or non-pharmaceutical  
18 treatment).  
19  
20  
21  
22  
23  
24  
25  
26  
27  
28

### 29 **Outcome measures**

30  
31 Participants will receive a WeChat notification to complete the assessments online. At all times,  
32 all the assessment will be consistent across participants. If participants do not complete the  
33 questionnaire within two days, they will receive a reminder message. At baseline,  
34 demographics and related clinical data will be collected. Descriptive data on lifestyle practices  
35 such as tea and coffee consumption, smoking, and alcohol use will also be recorded.  
36  
37  
38  
39  
40

### 41 **Primary outcome measures**

42 The Change in insomnia symptoms will be measured by the insomnia severity index (ISI) [29,  
43 30], which assesses the severity, nature, and impact of insomnia. It is a 7-item self-report  
44 measure, ranging from 0 (no problem) to 4 (very severe problem). The resulting sum score of  
45 the ISI ranges from 0 to 28. This outcome will be measured again at week 2 (one week after  
46 treatment is complete) and week 12 (three month follow-up) in both eCBTI and Control groups.  
47  
48  
49  
50  
51  
52 Another primary outcome measure is the Ford Insomnia Response to Stress Test (FIRST) [31], a  
53 measure to identify sleep disturbance and predisposition to persistent insomnia. Scores on this  
54 nine-item self-report questionnaire range from 9 to 36.  
55  
56  
57

### Secondary outcome measures

Subjects' general sleep hygiene and practices will be measured with Sleep Hygiene and Practices Scale (SHPS) [32]. Dysfunctional Beliefs and Attitudes about Sleep Scale (DBAS) [33] will be used to measure sleep-related beliefs, potential treatments, expectations, and attitudes towards causes. Problems of sleep initiation will be assessed with the Pre-Sleep Arousal Scale (PSAS) [34]. We will also assess patient's chronotype using the 5-item Morningness-Eveningness Questionnaire (MEQ-5) [35], generic health outcomes from the patient's perspective using the 12-Item Short Form Health Survey(SF-12) [36, 37], and anxiety and depression level using the Hospital Anxiety and Depression Scale (HADS) [38]. Participants in the treatment group will be also asked to complete a self-reported questionnaire to assess their treatment adherence and perceived helpfulness using Treatment Adherence Scale (TAS) [39]. Participants' satisfaction with the treatment will be measured using Treatment Satisfaction Scale (TSS) [40].

### Sample size estimation

Previous studies have indicated that approximately 40% of episodic insomnia patients transits to persistent insomnia [9, 10]. Based on our previous clinical experience, we anticipate that more than 70% of the subjects will have been retained at 12-week follow-up. In order to meet the 95% confidence intervals (CI) with 35%-49% requirement, the current project needs 200 cases of episodic insomnia. This sample size ensures the statistical effect is greater than 0.8 in continuous data of small sample (Cohen  $d = 0.30$ ), and also ensures that the odds ratio (OR) of dichotomous variables is greater than 1.50 ( $p > 0.05$ ).

### Statistical analysis

Intention to treat (ITT) [41] will be used for the main efficacy analysis and per protocol (PP) for the consistency test. ITT group consists of all participants who have undergone at least one week of treatment and evaluation. PP group refers to all ITT subjects who have not experienced significant program deviation or violation. In ITT analysis, last observation carried forward (LOCF) method will be used to analyze any missing therapeutic data.

Mean with standard deviation for continuous variables, and the frequency with a percentage for categorical variables will be reported. Independent t-test and non-parametric analyses,



1  
2  
3 where appropriate, will be applied to compare the differences between two groups. Repeated  
4 measurement analysis will be utilized to compare the changes of symptoms (e.g. ISI score)  
5 following treatment and at 3-month follow-up. The clinical outcome of categorical variables will  
6 be computed using survival analysis or Chi Square test, such as the appearance of suicidal  
7 ideation (as measured by 'Yes/No' question). Statistical analyses will be conducted using SPSS  
8 Analytics software v.22.0. Alpha will be set as 0.05 for all tests (2 sided).  
9  
10  
11  
12  
13

### 14 15 **Ethics and Dissemination**

16 Electronic informed consent form will be signed by all participants. Participants are ensured  
17 that the participation is completely voluntary, and their information will be kept confidential.  
18 The ethical approval for the study has been obtained from Ethics Committee of Southern  
19 Medical University (reference number: NFEC-2017-131). Zhang bin and his research team will  
20 have access to the final dataset and make the final decision to terminate the trial. The results of  
21 the investigation will be published in scientific papers. The data from the investigation will be  
22 made available online if necessary.  
23  
24  
25  
26  
27  
28  
29

### 30 31 **Patient and Public Involvement**

32 Patients or the public WERE NOT involved in the design, or conduct, or reporting, or  
33 dissemination of our research.  
34  
35  
36  
37  
38  
39  
40  
41  
42  
43  
44  
45  
46  
47  
48  
49  
50  
51  
52  
53  
54  
55  
56  
57  
58  
59  
60

## Discussion

episodic insomnia is a common phenomenon and might be a significant contributory causal factor in the transition from episodic insomnia to persistent insomnia. E-aid CBTI is more efficient, flexible, and time-saving compared to traditional face-to-face CBTI, and may also help to improve an individual's mood disturbance (e.g. anxiety and depressive symptoms) as well as quality of life. The main aim of the current trial is to investigate whether a brief eCBTI programme is effective to prevent the transition from acute insomnia to persistent insomnia. A previous placebo-controlled RCT demonstrated that online CBTI yields an effect size comparable to that of a traditionally delivered face to face therapy [28]. Furthermore, a previous RCT has provided some preliminary support for the efficacy of treating acute insomnia with a test of single-shot CBTI [16]. The study design benefits from being administered online with a smartphone app which is used widely in China, allowing us to recruit adequate research participants and limit researcher bias during the conduct of the study. Nonetheless, the study will test the key hypothesis that episodic insomnia is a contributory causal factor or natural course in the occurrence of persistent insomnia.

## Limitation

First, double-blinded study design is unable to be fulfilled in the current study, only the onsite-research staff are blinded to the group assignment. Second, the sample size of this study is relatively small, the results might thus not be representative of the general population. Third, sleep measurements in our study are mainly based on self-reports, apart from subjective sleep measurements, objective measurements, such as actigraphy and polysomnography would be beneficial.

### **Trial status**

Recruitment began in October 2017. It is anticipated that recruitment will be complete by October 2019, and that trial results will be available in 2020.

### **Funding statement**

This study is funded by the President Foundation of Nanfang Hospital, Southern Medical University (2017L001), Key Item of Guangzhou bureau of education (2019KC106), Innovation Item of Guangdong Provincial Department of Education (2018A043442), and Project of Guangzhou Philosophy and Society Development (2018GZGJ58).

### **Authors' contributions**

Study Design: Bin Zhang

Drafting of the manuscript: Yuan Yang, Xian Luo, and Dharendra Paudel

Critical revision of the manuscript: Jihui Zhang, Shirley Xin, and Bin Zhang

Approval of the final version for publication: all co-authors.

### **Competing interests**

The authors declare that they have no competing interests.

## References

1. Zhang, B. and Y.K. Wing, *Sex differences in insomnia: a meta-analysis*. Sleep, 2006. **29**(1): p. 85-93.
2. Daley, M., et al., *The Economic Burden of Insomnia: Direct and Indirect Costs for Individuals with Insomnia Syndrome, Insomnia Symptoms, and Good Sleepers*. Sleep, 2009. **32**(1): p. 55-64.
3. Li, S.X., et al., *Prevalence and correlates of frequent nightmares: a community-based 2-phase study*. Sleep, 2010. **33**(6): p. 774-80.
4. Baglioni, C., et al., *Sleep, Depression and Insomnia – A Vicious Circle?* Vol. 10. 2014.
5. Fernandez-Mendoza, J. and A.N. Vgontzas, *Insomnia and its impact on physical and mental health*. Curr Psychiatry Rep, 2013. **15**(12): p. 418.
6. American Psychiatric Association, *Diagnostic and Statistical Manual of Mental Disorders, Fifth Edition (DSM-5)*. APA, Washington, DC, 2013.
7. House, P.s.M.P., *Guidelines for diagnosis and treatment of insomnia in People's Republic of China*. 2016, China: People's Medical Publishing House.
8. Ellis, J.G., et al., *Acute insomnia: current conceptualizations and future directions*. Sleep Med Rev, 2012. **16**(1): p. 5-14.
9. Ellis, J.G., et al., *The natural history of insomnia: focus on prevalence and incidence of acute insomnia*. J Psychiatr Res, 2012. **46**(10): p. 1278-85.
10. Ellis, J.G., et al., *The natural history of insomnia: acute insomnia and first-onset depression*. Sleep, 2014. **37**(1): p. 97-106.
11. American Academy of Sleep, M., *International classification of sleep disorders*. 2014.
12. Drerup, M., *Insomnia, Cognitive Behavioral Treatment of*, in *Encyclopedia of the Neurological Sciences*. 2014, Academic Press: Oxford. p. 708-710.
13. House, P.s.M.P., *Cognitive Behavioral Treatment of Insomnia - A Session-by-Session Guide*. 2012, China: People's Medical Publishing House.
14. Sivertsen, B., *Cognitive behavioural therapy for insomnia*. Vol. 2. 2009. 61-34.
15. Smith, M.T., M.I. Huang, and R. Manber, *Cognitive behavior therapy for chronic insomnia occurring within the context of medical and psychiatric disorders*. Clinical Psychology Review, 2005. **25**(5): p. 559-592.
16. Ellis, J.G., T. Cushing, and A. Germain, *Treating Acute Insomnia: A Randomized Controlled Trial of a "Single-Shot" of Cognitive Behavioral Therapy for Insomnia*. Sleep, 2015. **38**(6): p. 971-8.
17. Perils, M.L. and M.T. Smith, *How can we make CBT-I and other BSM services widely available?* Journal of Clinical Sleep Medicine Jcsm Official Publication of the American Academy of Sleep Medicine, 2008. **4**(1): p. 11-3.
18. Espie, C.A., *"Stepped care": A health technology solution for delivering cognitive behavioral therapy as a first line insomnia treatment*. Sleep, 2009. **32**(12): p. 1549.
19. Cheng, S.K. and J. Dizon, *Computerised Cognitive Behavioural Therapy for Insomnia: A Systematic Review and Meta-Analysis*. Psychotherapy & Psychosomatics, 2012. **81**(4): p. 206-216.
20. Ho, F.Y., et al. *Self-Help Cognitive-Behavioral Therapy for Insomnia (CBT-I): A Systematic Review of Randomized Controlled Trials*. in *Nordic Conference*. 2013.
21. van Straten, A. and P. Cuijpers, *Self-help therapy for insomnia: a meta-analysis*. Sleep Med Rev, 2009. **13**(1): p. 61-71.
22. Ritterband, L.M., et al., *Initial evaluation of an Internet intervention to improve the sleep of cancer survivors with insomnia*. Psychooncology, 2012. **21**(7): p. 695-705.
23. Espie, C.A., et al., *Attribution, cognition and psychopathology in persistent insomnia disorder: outcome and mediation analysis from a randomized placebo-controlled trial of online cognitive behavioural therapy*. Sleep Med, 2014. **15**(8): p. 913-7.
24. Espie, C.A., et al., *Digital Cognitive Behavioural Therapy for Insomnia versus sleep hygiene education: the impact of improved sleep on functional health, quality of life and psychological well-being. Study protocol for a randomised controlled trial*. Trials, 2016. **17**(1): p. 257.

- 1
  - 2
  - 3
  - 4
  - 5
  - 6
  - 7
  - 8
  - 9
  - 10
  - 11
  - 12
  - 13
  - 14
  - 15
  - 16
  - 17
  - 18
  - 19
  - 20
  - 21
  - 22
  - 23
  - 24
  - 25
  - 26
  - 27
  - 28
  - 29
  - 30
  - 31
  - 32
  - 33
  - 34
  - 35
  - 36
  - 37
  - 38
  - 39
  - 40
  - 41
  - 42
  - 43
  - 44
  - 45
  - 46
  - 47
  - 48
  - 49
  - 50
  - 51
  - 52
  - 53
  - 54
  - 55
  - 56
  - 57
  - 58
  - 59
  - 60
25. Hewitt, C.E. and D.J. Torgerson, *Is restricted randomisation necessary?* *Bmj*, 2006. **332**(7556): p. 1506.
26. Espie, C.A., et al., *The clinical effectiveness of cognitive behaviour therapy for chronic insomnia: implementation and evaluation of a sleep clinic in general medical practice*. *Behaviour Research & Therapy*, 2001. **39**(1): p. 45-60.
27. Espie, C.A., et al., *Randomized clinical effectiveness trial of nurse-administered small-group cognitive behavior therapy for persistent insomnia in general practice*. *Sleep*, 2007. **30**(5): p. 574-584.
28. Espie, C.A., et al., *A randomized, placebo-controlled trial of online cognitive behavioral therapy for chronic insomnia disorder delivered via an automated media-rich web application*. *Sleep*, 2012. **35**(6): p. 769-81.
29. Morin, C.M., et al., *The Insomnia Severity Index: Psychometric Indicators to Detect Insomnia Cases and Evaluate Treatment Response*. *Sleep*, 2011. **34**(5): p. 601.
30. Shapour, B.A. and C.K. Gang, *Reliability and Validity of the Chinese Translation of Insomnia Severity Index and Comparison with Pittsburgh Sleep Quality Index*. *Malaysian Journal of Psychiatry*, 2013. **22**(2): p. 1-7.
31. Gao, C.Y., et al., *Initial application of Chinese version of Ford insomnia response to stress test scale*. *Journal of Clinical Psychiatry*, 2014: p. 305-307.
32. Yang, C.M. and S.S. Lin, *Maladaptive sleep hygiene practices in good sleepers and patients with insomnia*. *Journal of Health Psychology*, 2010. **15**(1): p. 147.
33. Espie, C.A., et al., *Insomniacs' attributions. psychometric properties of the Dysfunctional Beliefs and Attitudes about Sleep Scale and the Sleep Disturbance Questionnaire*. *Journal of Psychosomatic Research*, 2000. **48**(2): p. 141-148.
34. Nicassio, P.M., et al., *The phenomenology of the pre-sleep state: the development of the pre-sleep arousal scale*. *Behaviour Research & Therapy*, 1985. **23**(3): p. 263-271.
35. Wei-Xia, L.I., et al., *Validity and reliability of the Chinese version of Morningness/Eveningness Questionnaire-5 items(MEQ-5) in students of technical schools*. *Chinese Mental Health Journal*, 2016. **30**(6): p. 406-412.
36. Jr, W.J., M. Kosinski, and S.D. Keller, *A 12-Item Short-Form Health Survey: construction of scales and preliminary tests of reliability and validity*. *Medical Care*, 1996. **34**(3): p. 220-233.
37. Shou, J., et al., *Reliability and validity of 12-item Short-Form health survey (SF-12) for the health status of Chinese community elderly population in Xujiahui district of Shanghai*. *Aging Clinical & Experimental Research*, 2016. **28**(2): p. 339-346.
38. Zigmond, A.S. and R.P. Snaith, *The hospital anxiety and depression scale*. *Acta Psychiatr Scand*, 1983. **67**(6): p. 361-70.
39. Milosevic, I., et al., *The Treatment Acceptability/Adherence Scale: Moving Beyond the Assessment of Treatment Effectiveness*. *Cogn Behav Ther*, 2015. **44**(6): p. 456-69.
40. DiBenedetti, D.B., et al., *The treatment satisfaction scale: a multidimensional instrument for the assessment of treatment satisfaction for erectile dysfunction patients and their partners*. *Eur Urol*, 2005. **48**(3): p. 503-11.
41. Alshurafa, M., et al., *Inconsistent definitions for intention-to-treat in relation to missing outcome data: systematic review of the methods literature*. *PLoS One*, 2012. **7**(11): p. e49163.

1  
2  
3  
4  
5  
6  
7  
8  
9  
10  
11  
12  
13  
14  
15  
16  
17  
18  
19  
20  
21  
22  
23  
24  
25  
26  
27  
28  
29  
30  
31  
32  
33  
34  
35  
36  
37  
38  
39  
40  
41  
42  
43  
44  
45  
46  
47  
48  
49  
50  
51  
52  
53  
54  
55  
56  
57  
58  
59  
60

**Figure legend**  
**Figure 1 Recruitment Flowchart**

For peer review only

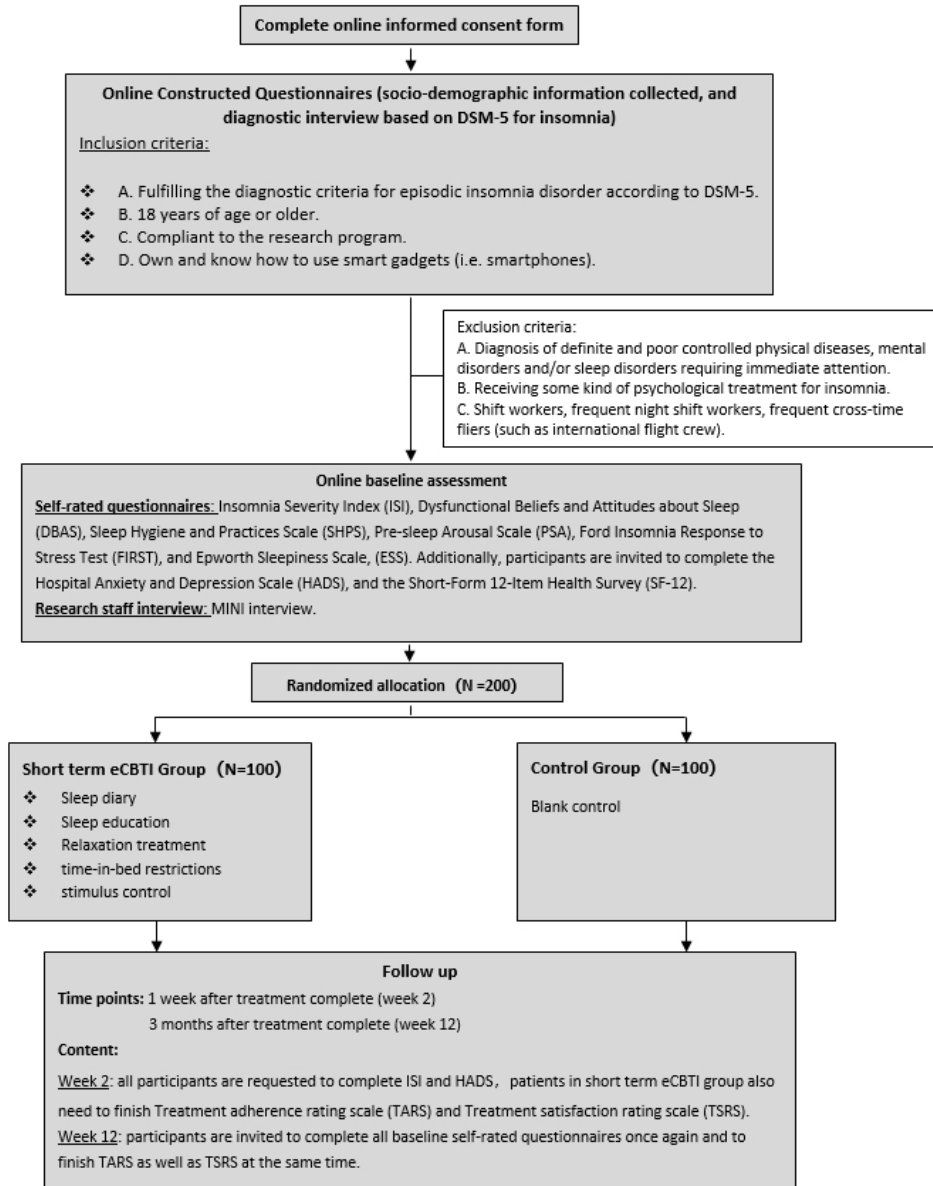

Recruitment Flowchart

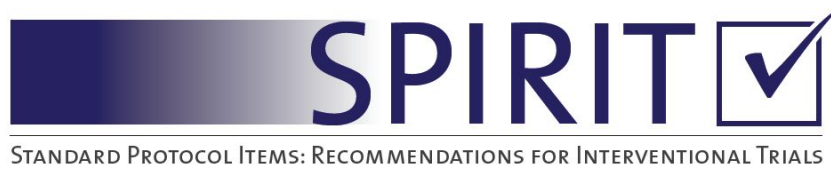

STANDARD PROTOCOL ITEMS: RECOMMENDATIONS FOR INTERVENTIONAL TRIALS

SPIRIT 2013 Checklist: Recommended items to address in a clinical trial protocol and related documents\*

| Section/item                                              | ItemNo        | Description                                                                                                                                                                                                                                                                              |
|-----------------------------------------------------------|---------------|------------------------------------------------------------------------------------------------------------------------------------------------------------------------------------------------------------------------------------------------------------------------------------------|
| <b>Administrative information</b>                         |               |                                                                                                                                                                                                                                                                                          |
| Title                                                     | 1 <b>P1</b>   | Descriptive title identifying the study design, population, interventions, and, if applicable, trial acronym                                                                                                                                                                             |
| Trial registration                                        | 2a <b>P2</b>  | Trial identifier and registry name. If not yet registered, name of intended registry                                                                                                                                                                                                     |
|                                                           | 2b <b>NA</b>  | All items from the World Health Organization Trial Registration Data Set                                                                                                                                                                                                                 |
| Protocol version                                          | 3 <b>P1</b>   | Date and version identifier                                                                                                                                                                                                                                                              |
| Funding                                                   | 4 <b>P14</b>  | Sources and types of financial, material, and other support                                                                                                                                                                                                                              |
| Roles and responsibilities                                | 5a <b>P14</b> | Names, affiliations, and roles of protocol contributors                                                                                                                                                                                                                                  |
|                                                           | 5b <b>NA</b>  | Name and contact information for the trial sponsor                                                                                                                                                                                                                                       |
|                                                           | 5c <b>P14</b> | Role of study sponsor and funders, if any, in study design; collection, management, analysis, and interpretation of data; writing of the report; and the decision to submit the report for publication, including whether they will have ultimate authority over any of these activities |
|                                                           | 5d <b>NA</b>  | Composition, roles, and responsibilities of the coordinating centre, steering committee, endpoint adjudication committee, data management team, and other individuals or groups overseeing the trial, if applicable (see Item 21a for data monitoring committee)                         |
| <b>Introduction</b>                                       |               |                                                                                                                                                                                                                                                                                          |
| Background and rationale                                  | 6a <b>5-7</b> | Description of research question and justification for undertaking the trial, including summary of relevant studies (published and unpublished) examining benefits and harms for each intervention                                                                                       |
|                                                           | 6b <b>NA</b>  | Explanation for choice of comparators                                                                                                                                                                                                                                                    |
| Objectives                                                | 7 <b>P7</b>   | Specific objectives or hypotheses                                                                                                                                                                                                                                                        |
| Trial design                                              | 8 <b>P8</b>   | Description of trial design including type of trial (eg, parallel group, crossover, factorial, single group), allocation ratio, and framework (eg, superiority, equivalence, noninferiority, exploratory)                                                                                |
| <b>Methods: Participants, interventions, and outcomes</b> |               |                                                                                                                                                                                                                                                                                          |



|    |                      |        |                                                                                                                                                                                                                                                                                                                                                                                |
|----|----------------------|--------|--------------------------------------------------------------------------------------------------------------------------------------------------------------------------------------------------------------------------------------------------------------------------------------------------------------------------------------------------------------------------------|
| 1  |                      |        |                                                                                                                                                                                                                                                                                                                                                                                |
| 2  | Study setting        | 9 P8   | Description of study settings (eg, community clinic, academic hospital) and list of countries where data will be collected. Reference to where list of study sites can be obtained                                                                                                                                                                                             |
| 3  |                      |        |                                                                                                                                                                                                                                                                                                                                                                                |
| 4  |                      |        |                                                                                                                                                                                                                                                                                                                                                                                |
| 5  |                      |        |                                                                                                                                                                                                                                                                                                                                                                                |
| 6  | Eligibility criteria | 10 P8  | Inclusion and exclusion criteria for participants. If applicable, eligibility criteria for study centres and individuals who will perform the interventions (eg, surgeons, psychotherapists)                                                                                                                                                                                   |
| 7  |                      |        |                                                                                                                                                                                                                                                                                                                                                                                |
| 8  |                      |        |                                                                                                                                                                                                                                                                                                                                                                                |
| 9  |                      |        |                                                                                                                                                                                                                                                                                                                                                                                |
| 10 | Interventions        | 11a P9 | Interventions for each group with sufficient detail to allow replication, including how and when they will be administered                                                                                                                                                                                                                                                     |
| 11 |                      |        |                                                                                                                                                                                                                                                                                                                                                                                |
| 12 |                      |        |                                                                                                                                                                                                                                                                                                                                                                                |
| 13 |                      |        |                                                                                                                                                                                                                                                                                                                                                                                |
| 14 |                      | 11b NA | Criteria for discontinuing or modifying allocated interventions for a given trial participant (eg, drug dose change in response to harms, participant request, or improving/worsening disease)                                                                                                                                                                                 |
| 15 |                      |        |                                                                                                                                                                                                                                                                                                                                                                                |
| 16 |                      |        |                                                                                                                                                                                                                                                                                                                                                                                |
| 17 |                      |        |                                                                                                                                                                                                                                                                                                                                                                                |
| 18 |                      | 11c NA | Strategies to improve adherence to intervention protocols, and any procedures for monitoring adherence (eg, drug tablet return, laboratory tests)                                                                                                                                                                                                                              |
| 19 |                      |        |                                                                                                                                                                                                                                                                                                                                                                                |
| 20 |                      |        |                                                                                                                                                                                                                                                                                                                                                                                |
| 21 |                      | 11d 10 | Relevant concomitant care and interventions that are permitted or prohibited during the trial                                                                                                                                                                                                                                                                                  |
| 22 |                      |        |                                                                                                                                                                                                                                                                                                                                                                                |
| 23 |                      |        |                                                                                                                                                                                                                                                                                                                                                                                |
| 24 |                      |        |                                                                                                                                                                                                                                                                                                                                                                                |
| 25 | Outcomes             | 12 P10 | Primary, secondary, and other outcomes, including the specific measurement variable (eg, systolic blood pressure), analysis metric (eg, change from baseline, final value, time to event), method of aggregation (eg, median, proportion), and time point for each outcome. Explanation of the clinical relevance of chosen efficacy and harm outcomes is strongly recommended |
| 26 |                      |        |                                                                                                                                                                                                                                                                                                                                                                                |
| 27 |                      |        |                                                                                                                                                                                                                                                                                                                                                                                |
| 28 |                      |        |                                                                                                                                                                                                                                                                                                                                                                                |
| 29 |                      |        |                                                                                                                                                                                                                                                                                                                                                                                |
| 30 |                      |        |                                                                                                                                                                                                                                                                                                                                                                                |
| 31 | Participant timeline | 13 P17 | Time schedule of enrolment, interventions (including any run-ins and washouts), assessments, and visits for participants. A schematic diagram is highly recommended (see Figure)                                                                                                                                                                                               |
| 32 |                      |        |                                                                                                                                                                                                                                                                                                                                                                                |
| 33 |                      |        |                                                                                                                                                                                                                                                                                                                                                                                |
| 34 |                      |        |                                                                                                                                                                                                                                                                                                                                                                                |
| 35 |                      |        |                                                                                                                                                                                                                                                                                                                                                                                |
| 36 | Sample size          | 14 P11 | Estimated number of participants needed to achieve study objectives and how it was determined, including clinical and statistical assumptions supporting any sample size calculations                                                                                                                                                                                          |
| 37 |                      |        |                                                                                                                                                                                                                                                                                                                                                                                |
| 38 |                      |        |                                                                                                                                                                                                                                                                                                                                                                                |
| 39 |                      |        |                                                                                                                                                                                                                                                                                                                                                                                |
| 40 | Recruitment          | 15 P8  | Strategies for achieving adequate participant enrolment to reach target sample size                                                                                                                                                                                                                                                                                            |
| 41 |                      |        |                                                                                                                                                                                                                                                                                                                                                                                |
| 42 |                      |        |                                                                                                                                                                                                                                                                                                                                                                                |
| 43 |                      |        |                                                                                                                                                                                                                                                                                                                                                                                |

### Methods: Assignment of interventions (for controlled trials)

#### Allocation:

|    |                                  |        |                                                                                                                                                                                                                                                                                                                                                          |
|----|----------------------------------|--------|----------------------------------------------------------------------------------------------------------------------------------------------------------------------------------------------------------------------------------------------------------------------------------------------------------------------------------------------------------|
| 47 |                                  |        |                                                                                                                                                                                                                                                                                                                                                          |
| 48 | Sequence generation              | 16a P9 | Method of generating the allocation sequence (eg, computer-generated random numbers), and list of any factors for stratification. To reduce predictability of a random sequence, details of any planned restriction (eg, blocking) should be provided in a separate document that is unavailable to those who enrol participants or assign interventions |
| 49 |                                  |        |                                                                                                                                                                                                                                                                                                                                                          |
| 50 |                                  |        |                                                                                                                                                                                                                                                                                                                                                          |
| 51 |                                  |        |                                                                                                                                                                                                                                                                                                                                                          |
| 52 |                                  |        |                                                                                                                                                                                                                                                                                                                                                          |
| 53 |                                  |        |                                                                                                                                                                                                                                                                                                                                                          |
| 54 | Allocation concealment mechanism | 16b P8 | Mechanism of implementing the allocation sequence (eg, central telephone; sequentially numbered, opaque, sealed envelopes), describing any steps to conceal the sequence until interventions are assigned                                                                                                                                                |
| 55 |                                  |        |                                                                                                                                                                                                                                                                                                                                                          |
| 56 |                                  |        |                                                                                                                                                                                                                                                                                                                                                          |
| 57 |                                  |        |                                                                                                                                                                                                                                                                                                                                                          |
| 58 |                                  |        |                                                                                                                                                                                                                                                                                                                                                          |
| 59 |                                  |        |                                                                                                                                                                                                                                                                                                                                                          |
| 60 |                                  |        |                                                                                                                                                                                                                                                                                                                                                          |

- 1  
2 Implementation 16c P8 Who will generate the allocation sequence, who will enrol participants, and  
3 who will assign participants to interventions  
4  
5 Blinding 17a P8 Who will be blinded after assignment to interventions (eg, trial participants,  
6 (masking) care providers, outcome assessors, data analysts), and how  
7  
8 17b NA If blinded, circumstances under which unblinding is permissible, and  
9 procedure for revealing a participant's allocated intervention during the trial  
10

### 11 **Methods: Data collection, management, and analysis**

- 12  
13 Data collection 18a P9 Plans for assessment and collection of outcome, baseline, and other trial  
14 methods data, including any related processes to promote data quality (eg, duplicate  
15 measurements, training of assessors) and a description of study instruments  
16 (eg, questionnaires, laboratory tests) along with their reliability and validity, if  
17 known. Reference to where data collection forms can be found, if not in the  
18 protocol  
19  
20 18b NA Plans to promote participant retention and complete follow-up, including list  
21 of any outcome data to be collected for participants who discontinue or  
22 deviate from intervention protocols  
23  
24 Data 19 NA Plans for data entry, coding, security, and storage, including any related  
25 management processes to promote data quality (eg, double data entry; range checks for  
26 data values). Reference to where details of data management procedures  
27 can be found, if not in the protocol  
28  
29 Statistical 20a Statistical methods for analysing primary and secondary outcomes.  
30 methods P11 Reference to where other details of the statistical analysis plan can be found,  
31 if not in the protocol  
32  
33 20b Methods for any additional analyses (eg, subgroup and adjusted analyses)  
34 P11  
35  
36 20c NA Definition of analysis population relating to protocol non-adherence (eg, as  
37 randomised analysis), and any statistical methods to handle missing data  
38 (eg, multiple imputation)  
39  
40  
41  
42  
43

### 44 **Methods: Monitoring**

- 45  
46 Data monitoring 21a NA Composition of data monitoring committee (DMC); summary of its role and  
47 reporting structure; statement of whether it is independent from the sponsor  
48 and competing interests; and reference to where further details about its  
49 charter can be found, if not in the protocol. Alternatively, an explanation of  
50 why a DMC is not needed  
51  
52 21b Description of any interim analyses and stopping guidelines, including who  
53 will have access to these interim results and make the final decision to  
54 terminate the trial  
55 P12  
56  
57 Harms 22 P10 Plans for collecting, assessing, reporting, and managing solicited and  
58 spontaneously reported adverse events and other unintended effects of trial  
59 interventions or trial conduct  
60

|                                                                                                                                                                                                                                                                                                                               |                               |         |                                                                                                                                                                                                                                                                                     |
|-------------------------------------------------------------------------------------------------------------------------------------------------------------------------------------------------------------------------------------------------------------------------------------------------------------------------------|-------------------------------|---------|-------------------------------------------------------------------------------------------------------------------------------------------------------------------------------------------------------------------------------------------------------------------------------------|
| 1<br>2<br>3<br>4<br>5<br>6<br>7<br>8<br>9<br>10<br>11<br>12<br>13<br>14<br>15<br>16<br>17<br>18<br>19<br>20<br>21<br>22<br>23<br>24<br>25<br>26<br>27<br>28<br>29<br>30<br>31<br>32<br>33<br>34<br>35<br>36<br>37<br>38<br>39<br>40<br>41<br>42<br>43<br>44<br>45<br>46<br>47<br>48<br>49<br>50<br>51<br>52<br>53<br>54<br>55 | Auditing                      | 23 NA   | Frequency and procedures for auditing trial conduct, if any, and whether the process will be independent from investigators and the sponsor                                                                                                                                         |
| <b>Ethics and dissemination</b>                                                                                                                                                                                                                                                                                               |                               |         |                                                                                                                                                                                                                                                                                     |
| 7<br>8<br>9                                                                                                                                                                                                                                                                                                                   | Research ethics approval      | 24 P12  | Plans for seeking research ethics committee/institutional review board (REC/IRB) approval                                                                                                                                                                                           |
| 10<br>11<br>12                                                                                                                                                                                                                                                                                                                | Protocol amendments           | 25 NA   | Plans for communicating important protocol modifications (eg, changes to eligibility criteria, outcomes, analyses) to relevant parties (eg, investigators, REC/IRBs, trial participants, trial registries, journals, regulators)                                                    |
| 15<br>16<br>17<br>18<br>19<br>20                                                                                                                                                                                                                                                                                              | Consent or assent             | 26a P12 | Who will obtain informed consent or assent from potential trial participants or authorised surrogates, and how (see Item 32)                                                                                                                                                        |
| 18<br>19<br>20<br>21<br>22                                                                                                                                                                                                                                                                                                    |                               | 26b NA  | Additional consent provisions for collection and use of participant data and biological specimens in ancillary studies, if applicable                                                                                                                                               |
| 21<br>22<br>23<br>24<br>25                                                                                                                                                                                                                                                                                                    | Confidentiality               | 27 P12  | How personal information about potential and enrolled participants will be collected, shared, and maintained in order to protect confidentiality before, during, and after the trial                                                                                                |
| 26<br>27<br>28                                                                                                                                                                                                                                                                                                                | Declaration of interests      | 28 P14  | Financial and other competing interests for principal investigators for the overall trial and each study site                                                                                                                                                                       |
| 29<br>30<br>31                                                                                                                                                                                                                                                                                                                | Access to data                | 29 P12  | Statement of who will have access to the final trial dataset, and disclosure of contractual agreements that limit such access for investigators                                                                                                                                     |
| 32<br>33<br>34                                                                                                                                                                                                                                                                                                                | Ancillary and post-trial care | 30 P10  | Provisions, if any, for ancillary and post-trial care, and for compensation to those who suffer harm from trial participation                                                                                                                                                       |
| 35<br>36<br>37<br>38<br>39<br>40<br>41<br>42<br>43<br>44<br>45                                                                                                                                                                                                                                                                | Dissemination policy          | 31a P12 | Plans for investigators and sponsor to communicate trial results to participants, healthcare professionals, the public, and other relevant groups (eg, via publication, reporting in results databases, or other data sharing arrangements), including any publication restrictions |
| 41<br>42                                                                                                                                                                                                                                                                                                                      |                               | 31b NA  | Authorship eligibility guidelines and any intended use of professional writers                                                                                                                                                                                                      |
| 43<br>44<br>45                                                                                                                                                                                                                                                                                                                |                               | 31c NA  | Plans, if any, for granting public access to the full protocol, participant-level dataset, and statistical code                                                                                                                                                                     |
| <b>Appendices</b>                                                                                                                                                                                                                                                                                                             |                               |         |                                                                                                                                                                                                                                                                                     |
| 48<br>49<br>50                                                                                                                                                                                                                                                                                                                | Informed consent materials    | 32 NA   | Model consent form and other related documentation given to participants and authorised surrogates                                                                                                                                                                                  |
| 51<br>52<br>53<br>54                                                                                                                                                                                                                                                                                                          | Biological specimens          | 33 NA   | Plans for collection, laboratory evaluation, and storage of biological specimens for genetic or molecular analysis in the current trial and for future use in ancillary studies, if applicable                                                                                      |

---

\*It is strongly recommended that this checklist be read in conjunction with the SPIRIT 2013 Explanation & Elaboration for important clarification on the items. Amendments to the protocol should be tracked and dated. The SPIRIT checklist is copyrighted by the SPIRIT Group under the Creative Commons "[Attribution-NonCommercial-NoDerivs 3.0 Unported](https://creativecommons.org/licenses/by-nc-nd/3.0/)" license.

# BMJ Open

## Effects of E-aid cognitive behavioral therapy for insomnia (eCBTI) to prevent the transition from episodic insomnia to persistent insomnia: study protocol for a randomized controlled trial

|                                 |                                                                                                                                                                                                                                                                                                                                                                                                                         |
|---------------------------------|-------------------------------------------------------------------------------------------------------------------------------------------------------------------------------------------------------------------------------------------------------------------------------------------------------------------------------------------------------------------------------------------------------------------------|
| Journal:                        | <i>BMJ Open</i>                                                                                                                                                                                                                                                                                                                                                                                                         |
| Manuscript ID                   | bmjopen-2019-033457.R2                                                                                                                                                                                                                                                                                                                                                                                                  |
| Article Type:                   | Protocol                                                                                                                                                                                                                                                                                                                                                                                                                |
| Date Submitted by the Author:   | 29-Oct-2019                                                                                                                                                                                                                                                                                                                                                                                                             |
| Complete List of Authors:       | Yang, Yuan; Southern Medical University Nanfang Hospital, Dept of Psychiatry<br>Luo, Xian; Southern Medical University Nanfang Hospital<br>Paudel , Dharendra; Southern Medical University Nanfang Hospital<br>Zhang, Jihui; The Chinese University of Hong Kong, Department of Psychiatry<br>Li, Shirley Xin ; University of Hong Kong<br>Zhang, Bin; Southern Medical University Nanfang Hospital, Dept of Psychiatry |
| <b>Primary Subject Heading</b>: | Mental health                                                                                                                                                                                                                                                                                                                                                                                                           |
| Secondary Subject Heading:      | Mental health                                                                                                                                                                                                                                                                                                                                                                                                           |
| Keywords:                       | MENTAL HEALTH, PSYCHIATRY, SLEEP MEDICINE                                                                                                                                                                                                                                                                                                                                                                               |
|                                 |                                                                                                                                                                                                                                                                                                                                                                                                                         |

SCHOLARONE™  
Manuscripts

**STUDY PROTOCOL (Sep 2017, V1)**

Main text: 2739 words

Abstract: 244 words

Figure: 1

Table: 0

**Effects of E-aid cognitive behavioral therapy for insomnia (eCBTI) to prevent the transition from episodic insomnia to persistent insomnia: study protocol for a randomized controlled trial**Yuan Yang<sup>1,2</sup>, MScXian Luo<sup>1,2</sup>, MD, MScDhirendra Paudel<sup>1,2</sup>, MMedJihui Zhang<sup>3</sup>, MD, PhDShirley Xin Li<sup>4,5</sup>, PhD, DCLinPsy, RPSGTBin Zhang<sup>1,2\*</sup>, MD, PhD

1. Department of Psychiatry, Southern Medical University Nanfang Hospital, Guangzhou, China; 2. Guangdong-Hong Kong-Macao Greater Bay Area Center for Brain Science and Brain-Inspired Intelligence, China 3. Department of Psychiatry, Faculty of Medicine, Chinese University of Hong Kong, Shatin, Hong Kong. 4. Department of Psychology, The University of Hong Kong, Hong Kong. 5. The State Key Laboratory of Brain and Cognitive Sciences, The University of Hong Kong, Hong Kong.

Address correspondence to: Prof. Bin Zhang, MD, PhD, Department of Psychiatry, Nanfang Hospital, Southern Medical University, Guangzhou, Guangdong, China; Tel: +86-20-62786731; Email: [zhang73bin@hotmail.com](mailto:zhang73bin@hotmail.com)

## Abstract

**Introduction:** Previous evidence suggested that online self-guided sleep intervention is efficacious in improving treatment outcomes in patients with persistent insomnia. However, the research on online sleep interventions targeting episodic insomnia has been scarce. This study aims to evaluate the effectiveness of brief e-aid cognitive behavioral therapy for insomnia (eCBTI) in preventing transition from episodic insomnia to persistent insomnia.

**Methods and analysis:** This is a pragmatic two-arm multi-center, randomized controlled trial comparing eCBTI with treatment as usual (TAU) in outpatients. Two hundred patients with episodic insomnia (as defined by DSM-5) will be recruited. Patients will be randomly assigned to receive one-week eCBTI via a Smartphone application, or to receive treatment as usual. Treatment effects will be assessed at 1 week and 3 months after intervention. The primary outcome of the study, whether the eCBTI program is sufficient in preventing transition from short-term to persistent insomnia, is measured by Insomnia Severity Index (ISI). Secondary outcome measurements include Dysfunctional Beliefs and Attitudes about Sleep (DBAS), Ford Insomnia Response to Stress Test (FIRST), Sleep Hygiene and Practices Scale (SHPS), Pre-sleep Arousal Scale (PSAS), and Epworth Sleepiness Scale (ESS). Additionally, Hospital Anxiety and Depression Scale (HADS) and the Short-Form 12-Item Health Survey (SF-12) will be used for the measurement of mood symptoms and quality of life.

**Ethics and dissemination:** The ethical approval for the study has been obtained from Ethics Committee of Southern Medical University (reference number: NFEC-2017-131). The results of the investigation will be published in scientific papers.

**Trial registration:** NCT03302455 (clinicaltrials.gov). Date of registration: October 5, 2017.

**Keywords:** E-aid cognitive behavior therapy for insomnia (eCBTI), episodic insomnia, randomized controlled trial (RCT).

### Strengths and limitations

- Participants will be randomly allocated using simple randomization (computer-generated random numbers).
- An independent researcher will implement randomization and treatment allocation through an automated online system.
- Onsite-research staff will be blinded to the group assignment and study outcomes during the entire trial.
- Statistical analyses will be carried out by an independent researcher.
- Double-blinded study design is unable to be fulfilled in the current study.

## Abbreviations

CBT, Cognitive Behavioral Therapy

CI, Confidence Intervals

DBAS, Dysfunctional Beliefs and Attitudes about Sleep

DSM-5, Diagnostic and Statistical Manual of Mental Disorders, Fifth Edition

eCBTI, e-aid Cognitive Behavior Therapy for Insomnia

ESS, Epworth Sleepiness Scale

FIRST, Ford Insomnia Response to Stress Test

HADS, Hospital Anxiety and Depression Scale

ISI, Insomnia Severity Index

ITT, Intention to Treat

LOCF, Last Observation Carried Forward

MEQ, Morningness-Eveningness Questionnaire

PP, Per Protocol

PSAS, Pre-sleep Arousal Scale

RCT, Randomized Controlled Trial

SF-12, Short-Form 12-Item Health Survey

SHPS, Sleep Hygiene and Practices Scale

TAS, Treatment Adherence Scale

TAU, Treatment as Usual

TSS, Treatment Satisfaction Scale

WMP, WeChat Mini Program



## Background

### *Insomnia disorder*

Insomnia is one of the most common sleep disorders. Most studies reported that 10-15% of adults meet the clinical diagnostic criteria for insomnia disorder [1]. On average, the economic burden of insomnia is 5010 US dollars per person per year, comparing with 421 dollars per year in an individual with good sleep, according to a study conducted in Quebec, Canada [2]. In addition, indirect consequential impairment caused by insomnia (such as work-related injuries and sickness leave) is significantly greater than direct damage (such as cost of treatment of insomnia). Moreover, insomnia is a prodromal symptom and risk factor for the development and persistence of various physical and mental disorders [3-5].

Based upon the course of illness, Insomnia is classified as 'persistent insomnia' (last three months or longer) or 'episodic insomnia' (last at least one month but less than 3 months) [6]. The diagnostic criteria for these two types of insomnia are similar, but persistent insomnia includes a minimum frequency of 'more than three nights per week' while episodic insomnia has no such criteria [6]. It is worth mentioning that episodic insomnia is a common social phenomenon, and most people would have experienced it, especially in response to situational stress or rapid changes in circadian rhythm [7]. episodic insomnia is often considered as a normal bio-psychological response with no significant impairment, episodic insomnia attracts less research attention than persistent insomnia [8]. Few longitudinal studies have investigated the natural course of insomnia. In the only two prospective studies conducted by Elis et al. specifically focusing on episodic insomnia, the annual prevalence of episodic insomnia was reported to be 36% and about 40% of the episodic insomnia patients eventually developed persistent insomnia [9, 10]. These two studies showed a high prevalence of episodic insomnia and a high susceptibility of developing long-term insomnia in those with episodic insomnia, which indicated that episodic insomnia could be a key transitional stage in the course of persistent insomnia. The findings suggested a need for developing timely, active intervention to prevent the conversion of episodic insomnia into persistent insomnia.

1  
2  
3 Whilst sleep disturbances may gradually improve in some patients once the initial stressors are  
4 resolved, a portion of patients with episodic insomnia may eventually transit to developing  
5 persistent insomnia despite the resolution of the environmental stressors [6, 11]. Due to the  
6 high recurrence rate of episodic insomnia, patients with episodic insomnia need to be actively  
7 treated. Furthermore, early psycho-behavioral interventions and/or medication are important  
8 to prevent episodic insomnia from the transition to persistent insomnia.  
9  
10  
11  
12  
13

### 14 *Cognitive behavioral therapy for insomnia (CBTI)*

15  
16  
17 Currently, treatment for insomnia includes psycho-behavioral intervention and/or medication.  
18 The psycho-behavioral therapy mostly refers to Cognitive Behavioral Therapy for Insomnia  
19 (CBTI), which is a treatment approach for insomnia with a strong evidence base [12]. CBTI aims  
20 to address the cognitive and behavioral factors that perpetuate insomnia, and consists of a  
21 constellation of treatment components, such as sleep hygiene education, relaxation therapy,  
22 stimulus control, sleep restriction, and cognitive therapy [13, 14]. In addition, CBTI may increase  
23 patients' self-efficacy and confidence to control their sleep problems and is currently suggested  
24 as the first-line treatment of insomnia in adults [15]. However, traditional CBTI program mainly  
25 focuses on the maintenance factors of insomnia, thus, it is mostly applied to treat persistent  
26 insomnia [15]. A study with small sample size (n=40) by Ellis et al. showed that brief version of  
27 CBTI is effective as the treatment of acute insomnia [16]. However, little is known about  
28 whether CBTI can prevent the transition of episodic insomnia to persistent insomnia. In  
29 addition, the dissemination of CBTI may be limited due to several obstacles. For example, the  
30 treatment procedure is complex, time-consuming, and costly [17]. It typically requires patients  
31 to travel to the hospital/clinic for face-to-face treatment, which may interfere with patients'  
32 routine work. In addition, CBTI is a specialized treatment approach which should be conducted  
33 by trained therapists, there may be significant variations between different therapists and  
34 clinical settings. Without proper guidance at home, patients may not be able to effectively  
35 apply the treatment strategies (e.g. relaxation, stimulus control, sleep restriction), which in turn  
36 might hinder the resolution of insomnia. Additionally, CBTI requires patients to record their  
37 sleep pattern every night. This task might increase patient's anxiety and aggravate their  
38 insomnia symptoms. To address these challenges, internet-based CBTI has been developed and  
39  
40  
41  
42  
43  
44  
45  
46  
47  
48  
49  
50  
51  
52  
53  
54  
55  
56  
57  
58  
59  
60

1  
2  
3 has been receiving widespread attention in the recent years, as it makes the delivery of CBTI  
4 more efficient and flexible, and helps to overcome the above shortcomings often associated  
5 with face-to-face treatment modality [18-20]. Several e-aid CBTI (eCBTI) treatment tools have  
6 been made available in the western countries (e.g. Sleepio, SHUTi), and have shown similar  
7 efficacy as compared to standard CBTI [19, 21-24]. However, further exploration and  
8 verification are still needed to examine the efficacy of eCBTI as a treatment for episodic  
9 insomnia in Chinese population.  
10  
11  
12  
13  
14  
15

### 16 *The current study*

17  
18  
19 In this study, we plan to establish a short-term eCBTI treatment program in Chinese to test  
20 whether eCBTI can reduce the transition from episodic insomnia to persistent insomnia.  
21 Moreover, we aim to investigate whether this program can improve sleep, anxiety, depression,  
22 and quality of life in individuals with episodic insomnia.  
23  
24  
25  
26  
27  
28

29 The primary hypothesis for the trial is:

30 The eCBTI intervention can reduce transition of episodic insomnia to persistent insomnia;

31 The secondary hypotheses are:

- 32 1. The eCBTI intervention can improve sleep in patients with episodic insomnia.
- 33 2. The eCBTI intervention can improve depressive and anxiety symptoms in patients with  
34 episodic insomnia;
- 35 3. The eCBTI intervention can improve patients' overall health status and quality of life.  
36  
37  
38  
39  
40  
41  
42  
43  
44  
45  
46  
47  
48  
49  
50  
51  
52  
53  
54  
55  
56  
57  
58  
59  
60

## Methods/Design

### Research design

This study is a parallel assignment, randomized controlled trial to compare eCBTI intervention versus treatment as usual (TAU). The screening, assessments, allocation, and intervention will all be carried out via a WeChat Mini Program (WMP) specially tailored for the trial. An information sheet will be provided online, and informed consent will be completed online before participation in the study. The ethical approval for the study has been obtained from Ethics Committee of Southern Medical University (reference number: NFEC-2017-131). The research design is summarized in Fig. 1.

### Participants

We plan to recruit 200 participants diagnosed with episodic insomnia according to the sample size estimation. Participants will be recruited from sleep clinics in 31 hospital sites in mainland China, and will be randomly allocated to two groups at 1:1 ratio, namely, eCBTI (n=100, 50%) or control group (TAU) (n=100, 50%). The eCBTI group will receive eCBTI core treatment daily for 1 week in addition to TAU, while the control group will only receive TAU.

### Eligibility criteria

To be included, participants must fulfill the following inclusion criteria:

- A. Meeting the diagnostic criteria for episodic insomnia according to DSM-5,
- B. 18 years of age or older,
- C. being able to comply to the intervention,
- D. Provision of electronic informed consent,
- E. Own and know how to use smart gadgets (such as smartphones, tablets, and computers).

Participants will be excluded if they meet the following exclusion criteria:

- A. Having a diagnosis of a significant untreated mental or medical illness (e.g. consciousness disturbances, mania, acute phase of schizophrenia, major depressive disorder, etc.),
- B. Have been receiving any kind of psychological treatment for insomnia in the past 6 months,
- C. Shift workers, frequent night shift workers, frequent cross-time fliers (e.g. international flight crew, shifted nurse/health professionals),

1  
2  
3 To allow for greater generalizability, this study does not exclude patients with a stable condition  
4 of somatic disease, mental disorders (e.g. depression in remission), and sleep disorders, or  
5 individuals receiving pharmacological treatments (e.g. antihypertensive drugs, antidepressants,  
6 and benzodiazepines).  
7  
8  
9

### 10 11 **Randomization**

12 This study is a randomized controlled trial. Participants fulfilling the study criteria will be  
13 randomly allocated to either eCBTI or Control group using simple randomization (computer-  
14 generated random numbers) [25]. An independent researcher from IT department will  
15 implement randomization and treatment allocation, which will be conducted through an  
16 automated online system. The research team will not be able to influence randomization and  
17 have no access to allocations.  
18  
19  
20  
21  
22  
23  
24

### 25 **Blindness of assessment and analysis**

26 Onsite-research staff will be blinded to the group assignment and study hypotheses of the trial.  
27 The independent researcher from IT department who carries out the randomization and  
28 allocation procedure will be blinded to the study protocol. Participants could not be blinded to  
29 treatment allocation as participants in blank control group only receive TAU. The research team  
30 will have limited contact with both IT staff and study participants therefore will not be able to  
31 bias the allocation or the assessments. Statistical analyses will be carried out by an independent  
32 researcher from the Southern Medical University who are not involved in the procedures of  
33 randomization and assessment.  
34  
35  
36  
37  
38  
39  
40  
41  
42

### 43 **Assessment points**

44 Assessments will be conducted at week 0 (baseline), week 2 (one week post treatment), and  
45 week 12 (3-month after intervention). In consideration of ethical matters, participants in the  
46 control group will be offered eCBTI at week 12.  
47  
48  
49  
50

### 51 **Planned intervention**

52 After baseline assessment, participants will be randomly assigned to receive one-week eCBTI or  
53 to receive treatment as usual. E-CBTI will be delivered using the WeChat Mini Program. The  
54  
55  
56  
57

1  
2  
3 program and all tools can be accessed using the WeChat app of any smartphone. With the  
4 assistance from several professional IT staff and clinical psychologists, the E-CBTI intervention  
5 program has been well-developed and tested before the start of our current study. Participants  
6 in the eCBTI group will receive the core sessions daily for one week. Participants will be  
7 provided with individualized treatment with the behavioral components (e.g. stimulus control,  
8 sleep restriction) according to their sleep pattern in the past 2 weeks prior to the treatment  
9 session), as well as the cognitive components (e.g. cognitive restructuring, paradoxical  
10 intention). Treatment elements also include daily sleep diary, relaxation audios (e.g. body scan,  
11 breathing exercise), and sleep hygiene education. The treatment content is designed based on  
12 the guidelines for CBTI [13, 26, 27].  
13  
14  
15  
16  
17  
18  
19  
20  
21

### 22 **Assessment of safety**

23 CBTI is a cognitive behavioral therapy and its risk of severe adverse events is low. Previous  
24 studies indicated that online CBTI is rather safe and did not report any adverse outcomes [28].  
25 In the current study, participant's insomnia severity will be monitored by subjective  
26 measurements during treatment and at a 3-month follow up. Additionally, psychiatrists will be  
27 involved to assess participant's suicidal ideation, professional intervention will be provided to  
28 those in need. Participants will be allowed to attend their usual clinical follow-up in the clinic  
29 and concurrently receive routine treatments for their clinical conditions, where needed. Any  
30 participant who reports worse insomnia symptoms after the completion of intervention will be  
31 introduced to receive standard treatment for insomnia (medication and/or non-pharmaceutical  
32 treatment).  
33  
34  
35  
36  
37  
38  
39  
40  
41  
42  
43

### 44 **Outcome measures**

45 Participants will receive a WeChat notification to complete the assessments online. At all times,  
46 all the assessment will be consistent across participants. If participants do not complete the  
47 questionnaire within two days, they will receive a reminder message. At baseline,  
48 demographics and related clinical data will be collected. Descriptive data on lifestyle practices  
49 such as tea and coffee consumption, smoking, and alcohol use will also be recorded.  
50  
51  
52  
53  
54  
55  
56  
57  
58  
59  
60

### Primary outcome measures

The Change in insomnia symptoms will be measured by the insomnia severity index (ISI) [29, 30], which assesses the severity, nature, and impact of insomnia. It is a 7-item self-report measure, ranging from 0 (no problem) to 4 (very severe problem). The resulting sum score of the ISI ranges from 0 to 28. This outcome will be measured again at week 2 (one week after treatment is complete) and week 12 (three month follow-up) in both eCBTI and Control groups. Another primary outcome measure is the Ford Insomnia Response to Stress Test (FIRST) [31], a measure to identify sleep disturbance and predisposition to persistent insomnia. Scores on this nine-item self-report questionnaire range from 9 to 36.

### Secondary outcome measures

Subjects' general sleep hygiene and practices will be measured with Sleep Hygiene and Practices Scale (SHPS) [32]. Dysfunctional Beliefs and Attitudes about Sleep Scale (DBAS) [33] will be used to measure sleep-related beliefs, potential treatments, expectations, and attitudes towards causes. Problems of sleep initiation will be assessed with the Pre-Sleep Arousal Scale (PSAS) [34]. We will also assess patient's chronotype using the 5-item Morningness-Eveningness Questionnaire (MEQ-5) [35], generic health outcomes from the patient's perspective using the 12-Item Short Form Health Survey(SF-12) [36, 37], and anxiety and depression level using the Hospital Anxiety and Depression Scale (HADS) [38]. Participants in the treatment group will be also asked to complete a self-reported questionnaire to assess their treatment adherence and perceived helpfulness using Treatment Adherence Scale (TAS) [39]. Participants' satisfaction with the treatment will be measured using Treatment Satisfaction Scale (TSS) [40].

### Sample size estimation

Previous studies have indicated that approximately 40% of episodic insomnia patients transits to persistent insomnia [9, 10]. Based on our previous clinical experience, we anticipate that more than 70% of the subjects will have been retained at 12-week follow-up. In order to meet the 95% confidence intervals (CI) with 35%-49% requirement, the current project needs 200 cases of episodic insomnia. This sample size ensures the statistical effect is greater than 0.8 in

1  
2  
3 continuous data of small sample (Cohen  $d = 0.30$ ), and also ensures that the odds ratio (OR) of  
4 dichotomous variables is greater than 1.50 ( $p > 0.05$ ).  
5  
6

### 7 8 **Statistical analysis**

9  
10 Intention to treat (ITT) [41] will be used for the main efficacy analysis and per protocol (PP) for  
11 the consistency test. ITT group consists of all participants who have undergone at least one  
12 week of treatment and evaluation. PP group refers to all ITT subjects who have not experienced  
13 significant program deviation or violation. In ITT analysis, last observation carried forward (LOCF)  
14 method will be used to analyze any missing therapeutic data.  
15  
16

17  
18 Mean with standard deviation for continuous variables, and the frequency with a percentage  
19 for categorical variables will be reported. Independent t-test and non-parametric analyses,  
20 where appropriate, will be applied to compare the differences between two groups. Repeated  
21 measurement analysis will be utilized to compare the changes of symptoms (e.g. ISI score)  
22 following treatment and at 3-month follow-up. The clinical outcome of categorical variables will  
23 be computed using survival analysis or Chi Square test, such as the appearance of suicidal  
24 ideation (as measured by 'Yes/No' question). Statistical analyses will be conducted using SPSS  
25 Analytics software v.22.0. Alpha will be set as 0.05 for all tests (2 sided).  
26  
27  
28  
29  
30  
31  
32  
33

### 34 35 **Ethics and Dissemination**

36  
37 Electronic informed consent form will be signed by all participants. Participants are ensured  
38 that the participation is completely voluntary, and their information will be kept confidential.  
39 The ethical approval for the study has been obtained from Ethics Committee of Southern  
40 Medical University (reference number: NFEC-2017-131). Zhang bin and his research team will  
41 have access to the final dataset and make the final decision to terminate the trial. The results of  
42 the investigation will be published in scientific papers. The data from the investigation will be  
43 made available online if necessary.  
44  
45  
46  
47  
48  
49

### 50 51 **Patient and Public Involvement**

52  
53 Patients or the public WERE NOT involved in the design, or conduct, or reporting, or  
54 dissemination of our research.  
55  
56  
57



## Discussion

episodic insomnia is a common phenomenon and might be a significant contributory causal factor in the transition from episodic insomnia to persistent insomnia. E-aid CBTI is more efficient, flexible, and time-saving compared to traditional face-to-face CBTI, and may also help to improve an individual's mood disturbance (e.g. anxiety and depressive symptoms) as well as quality of life. The main aim of the current trial is to investigate whether a brief eCBTI programme is effective to prevent the transition from acute insomnia to persistent insomnia. A previous placebo-controlled RCT demonstrated that online CBTI yields an effect size comparable to that of a traditionally delivered face to face therapy [28]. Furthermore, a previous RCT has provided some preliminary support for the efficacy of treating acute insomnia with a test of single-shot CBTI [16]. The study design benefits from being administered online with a smartphone app which is used widely in China, allowing us to recruit adequate research participants and limit researcher bias during the conduct of the study. Nonetheless, the study will test the key hypothesis that episodic insomnia is a contributory causal factor or natural course in the occurrence of persistent insomnia.

## Limitation

First, double-blinded study design is unable to be fulfilled in the current study, only the onsite-research staff are blinded to the group assignment. Second, the sample size of this study is relatively small, the results might thus not be representative of the general population. Third, sleep measurements in our study are mainly based on self-reports, apart from subjective sleep measurements, objective measurements, such as actigraphy and polysomnography would be beneficial.

### **Trial status**

Recruitment began in October 2017. It is anticipated that recruitment will be complete by October 2019, and that trial results will be available in 2020.

### **Funding statement**

This study is funded by the President Foundation of Nanfang Hospital, Southern Medical University (2017L001), Key Item of Guangzhou bureau of education (2019KC106), Innovation Item of Guangdong Provincial Department of Education (2018A043442), and Project of Guangzhou Philosophy and Society Development (2018GZGJ58).

### **Authors' contributions**

Study Design: Bin Zhang

Drafting of the manuscript: Yuan Yang, Xian Luo, and Dharendra Paudel

Critical revision of the manuscript: Jihui Zhang, Shirley Xin, and Bin Zhang

Approval of the final version for publication: all co-authors.

### **Competing interests**

The authors declare that they have no competing interests.

## References

1. Zhang, B. and Y.K. Wing, *Sex differences in insomnia: a meta-analysis*. Sleep, 2006. **29**(1): p. 85-93.
2. Daley, M., et al., *The Economic Burden of Insomnia: Direct and Indirect Costs for Individuals with Insomnia Syndrome, Insomnia Symptoms, and Good Sleepers*. Sleep, 2009. **32**(1): p. 55-64.
3. Li, S.X., et al., *Prevalence and correlates of frequent nightmares: a community-based 2-phase study*. Sleep, 2010. **33**(6): p. 774-80.
4. Baglioni, C., et al., *Sleep, Depression and Insomnia – A Vicious Circle?* Vol. 10. 2014.
5. Fernandez-Mendoza, J. and A.N. Vgontzas, *Insomnia and its impact on physical and mental health*. Curr Psychiatry Rep, 2013. **15**(12): p. 418.
6. American Psychiatric Association, *Diagnostic and Statistical Manual of Mental Disorders, Fifth Edition (DSM-5)*. APA, Washington, DC, 2013.
7. House, P.s.M.P., *Guidelines for diagnosis and treatment of insomnia in People's Republic of China*. 2016, China: People's Medical Publishing House.
8. Ellis, J.G., et al., *Acute insomnia: current conceptualizations and future directions*. Sleep Med Rev, 2012. **16**(1): p. 5-14.
9. Ellis, J.G., et al., *The natural history of insomnia: focus on prevalence and incidence of acute insomnia*. J Psychiatr Res, 2012. **46**(10): p. 1278-85.
10. Ellis, J.G., et al., *The natural history of insomnia: acute insomnia and first-onset depression*. Sleep, 2014. **37**(1): p. 97-106.
11. American Academy of Sleep, M., *International classification of sleep disorders*. 2014.
12. Drerup, M., *Insomnia, Cognitive Behavioral Treatment of*, in *Encyclopedia of the Neurological Sciences*. 2014, Academic Press: Oxford. p. 708-710.
13. House, P.s.M.P., *Cognitive Behavioral Treatment of Insomnia - A Session-by-Session Guide*. 2012, China: People's Medical Publishing House.
14. Sivertsen, B., *Cognitive behavioural therapy for insomnia*. Vol. 2. 2009. 61-34.
15. Smith, M.T., M.I. Huang, and R. Manber, *Cognitive behavior therapy for chronic insomnia occurring within the context of medical and psychiatric disorders*. Clinical Psychology Review, 2005. **25**(5): p. 559-592.
16. Ellis, J.G., T. Cushing, and A. Germain, *Treating Acute Insomnia: A Randomized Controlled Trial of a "Single-Shot" of Cognitive Behavioral Therapy for Insomnia*. Sleep, 2015. **38**(6): p. 971-8.
17. Perils, M.L. and M.T. Smith, *How can we make CBT-I and other BSM services widely available?* Journal of Clinical Sleep Medicine Jcsm Official Publication of the American Academy of Sleep Medicine, 2008. **4**(1): p. 11-3.
18. Espie, C.A., *"Stepped care": A health technology solution for delivering cognitive behavioral therapy as a first line insomnia treatment*. Sleep, 2009. **32**(12): p. 1549.
19. Cheng, S.K. and J. Dizon, *Computerised Cognitive Behavioural Therapy for Insomnia: A Systematic Review and Meta-Analysis*. Psychotherapy & Psychosomatics, 2012. **81**(4): p. 206-216.
20. Ho, F.Y., et al. *Self-Help Cognitive-Behavioral Therapy for Insomnia (CBT-I): A Systematic Review of Randomized Controlled Trials*. in *Nordic Conference*. 2013.
21. van Straten, A. and P. Cuijpers, *Self-help therapy for insomnia: a meta-analysis*. Sleep Med Rev, 2009. **13**(1): p. 61-71.
22. Ritterband, L.M., et al., *Initial evaluation of an Internet intervention to improve the sleep of cancer survivors with insomnia*. Psychooncology, 2012. **21**(7): p. 695-705.
23. Espie, C.A., et al., *Attribution, cognition and psychopathology in persistent insomnia disorder: outcome and mediation analysis from a randomized placebo-controlled trial of online cognitive behavioural therapy*. Sleep Med, 2014. **15**(8): p. 913-7.
24. Espie, C.A., et al., *Digital Cognitive Behavioural Therapy for Insomnia versus sleep hygiene education: the impact of improved sleep on functional health, quality of life and psychological well-being. Study protocol for a randomised controlled trial*. Trials, 2016. **17**(1): p. 257.

- 1
  - 2
  - 3
  - 4
  - 5
  - 6
  - 7
  - 8
  - 9
  - 10
  - 11
  - 12
  - 13
  - 14
  - 15
  - 16
  - 17
  - 18
  - 19
  - 20
  - 21
  - 22
  - 23
  - 24
  - 25
  - 26
  - 27
  - 28
  - 29
  - 30
  - 31
  - 32
  - 33
  - 34
  - 35
  - 36
  - 37
  - 38
  - 39
  - 40
  - 41
  - 42
  - 43
  - 44
  - 45
  - 46
  - 47
  - 48
  - 49
  - 50
  - 51
  - 52
  - 53
  - 54
  - 55
  - 56
  - 57
  - 58
  - 59
  - 60
25. Hewitt, C.E. and D.J. Torgerson, *Is restricted randomisation necessary?* *Bmj*, 2006. **332**(7556): p. 1506.
26. Espie, C.A., et al., *The clinical effectiveness of cognitive behaviour therapy for chronic insomnia: implementation and evaluation of a sleep clinic in general medical practice.* *Behaviour Research & Therapy*, 2001. **39**(1): p. 45-60.
27. Espie, C.A., et al., *Randomized clinical effectiveness trial of nurse-administered small-group cognitive behavior therapy for persistent insomnia in general practice.* *Sleep*, 2007. **30**(5): p. 574-584.
28. Espie, C.A., et al., *A randomized, placebo-controlled trial of online cognitive behavioral therapy for chronic insomnia disorder delivered via an automated media-rich web application.* *Sleep*, 2012. **35**(6): p. 769-81.
29. Morin, C.M., et al., *The Insomnia Severity Index: Psychometric Indicators to Detect Insomnia Cases and Evaluate Treatment Response.* *Sleep*, 2011. **34**(5): p. 601.
30. Shapour, B.A. and C.K. Gang, *Reliability and Validity of the Chinese Translation of Insomnia Severity Index and Comparison with Pittsburgh Sleep Quality Index.* *Malaysian Journal of Psychiatry*, 2013. **22**(2): p. 1-7.
31. Gao, C.Y., et al., *Initial application of Chinese version of Ford insomnia response to stress test scale.* *Journal of Clinical Psychiatry*, 2014: p. 305-307.
32. Yang, C.M. and S.S. Lin, *Maladaptive sleep hygiene practices in good sleepers and patients with insomnia.* *Journal of Health Psychology*, 2010. **15**(1): p. 147.
33. Espie, C.A., et al., *Insomniacs' attributions. psychometric properties of the Dysfunctional Beliefs and Attitudes about Sleep Scale and the Sleep Disturbance Questionnaire.* *Journal of Psychosomatic Research*, 2000. **48**(2): p. 141-148.
34. Nicassio, P.M., et al., *The phenomenology of the pre-sleep state: the development of the pre-sleep arousal scale.* *Behaviour Research & Therapy*, 1985. **23**(3): p. 263-271.
35. Wei-Xia, L.I., et al., *Validity and reliability of the Chinese version of Morningness/Eveningness Questionnaire-5 items(MEQ-5) in students of technical schools.* *Chinese Mental Health Journal*, 2016. **30**(6): p. 406-412.
36. Jr, W.J., M. Kosinski, and S.D. Keller, *A 12-Item Short-Form Health Survey: construction of scales and preliminary tests of reliability and validity.* *Medical Care*, 1996. **34**(3): p. 220-233.
37. Shou, J., et al., *Reliability and validity of 12-item Short-Form health survey (SF-12) for the health status of Chinese community elderly population in Xujiahui district of Shanghai.* *Aging Clinical & Experimental Research*, 2016. **28**(2): p. 339-346.
38. Zigmond, A.S. and R.P. Snaith, *The hospital anxiety and depression scale.* *Acta Psychiatr Scand*, 1983. **67**(6): p. 361-70.
39. Milosevic, I., et al., *The Treatment Acceptability/Adherence Scale: Moving Beyond the Assessment of Treatment Effectiveness.* *Cogn Behav Ther*, 2015. **44**(6): p. 456-69.
40. DiBenedetti, D.B., et al., *The treatment satisfaction scale: a multidimensional instrument for the assessment of treatment satisfaction for erectile dysfunction patients and their partners.* *Eur Urol*, 2005. **48**(3): p. 503-11.
41. Alshurafa, M., et al., *Inconsistent definitions for intention-to-treat in relation to missing outcome data: systematic review of the methods literature.* *PLoS One*, 2012. **7**(11): p. e49163.

1  
2  
3  
4  
5  
6  
7  
8  
9  
10  
11  
12  
13  
14  
15  
16  
17  
18  
19  
20  
21  
22  
23  
24  
25  
26  
27  
28  
29  
30  
31  
32  
33  
34  
35  
36  
37  
38  
39  
40  
41  
42  
43  
44  
45  
46  
47  
48  
49  
50  
51  
52  
53  
54  
55  
56  
57  
58  
59  
60

**Figure legend**  
**Figure 1 Recruitment Flowchart**

For peer review only



Recruitment Flowchart



STANDARD PROTOCOL ITEMS: RECOMMENDATIONS FOR INTERVENTIONAL TRIALS

SPIRIT 2013 Checklist: Recommended items to address in a clinical trial protocol and related documents\*

| Section/item                                              | ItemNo        | Description                                                                                                                                                                                                                                                                              |
|-----------------------------------------------------------|---------------|------------------------------------------------------------------------------------------------------------------------------------------------------------------------------------------------------------------------------------------------------------------------------------------|
| <b>Administrative information</b>                         |               |                                                                                                                                                                                                                                                                                          |
| Title                                                     | 1 <b>P1</b>   | Descriptive title identifying the study design, population, interventions, and, if applicable, trial acronym                                                                                                                                                                             |
| Trial registration                                        | 2a <b>P2</b>  | Trial identifier and registry name. If not yet registered, name of intended registry                                                                                                                                                                                                     |
|                                                           | 2b <b>NA</b>  | All items from the World Health Organization Trial Registration Data Set                                                                                                                                                                                                                 |
| Protocol version                                          | 3 <b>P1</b>   | Date and version identifier                                                                                                                                                                                                                                                              |
| Funding                                                   | 4 <b>P14</b>  | Sources and types of financial, material, and other support                                                                                                                                                                                                                              |
| Roles and responsibilities                                | 5a <b>P14</b> | Names, affiliations, and roles of protocol contributors                                                                                                                                                                                                                                  |
|                                                           | 5b <b>NA</b>  | Name and contact information for the trial sponsor                                                                                                                                                                                                                                       |
|                                                           | 5c <b>P14</b> | Role of study sponsor and funders, if any, in study design; collection, management, analysis, and interpretation of data; writing of the report; and the decision to submit the report for publication, including whether they will have ultimate authority over any of these activities |
|                                                           | 5d <b>NA</b>  | Composition, roles, and responsibilities of the coordinating centre, steering committee, endpoint adjudication committee, data management team, and other individuals or groups overseeing the trial, if applicable (see Item 21a for data monitoring committee)                         |
| <b>Introduction</b>                                       |               |                                                                                                                                                                                                                                                                                          |
| Background and rationale                                  | 6a <b>5-7</b> | Description of research question and justification for undertaking the trial, including summary of relevant studies (published and unpublished) examining benefits and harms for each intervention                                                                                       |
|                                                           | 6b <b>NA</b>  | Explanation for choice of comparators                                                                                                                                                                                                                                                    |
| Objectives                                                | 7 <b>P7</b>   | Specific objectives or hypotheses                                                                                                                                                                                                                                                        |
| Trial design                                              | 8 <b>P8</b>   | Description of trial design including type of trial (eg, parallel group, crossover, factorial, single group), allocation ratio, and framework (eg, superiority, equivalence, noninferiority, exploratory)                                                                                |
| <b>Methods: Participants, interventions, and outcomes</b> |               |                                                                                                                                                                                                                                                                                          |

|    |                      |        |                                                                                                                                                                                                                                                                                                                                                                                |
|----|----------------------|--------|--------------------------------------------------------------------------------------------------------------------------------------------------------------------------------------------------------------------------------------------------------------------------------------------------------------------------------------------------------------------------------|
| 1  |                      |        |                                                                                                                                                                                                                                                                                                                                                                                |
| 2  | Study setting        | 9 P8   | Description of study settings (eg, community clinic, academic hospital) and list of countries where data will be collected. Reference to where list of study sites can be obtained                                                                                                                                                                                             |
| 3  |                      |        |                                                                                                                                                                                                                                                                                                                                                                                |
| 4  |                      |        |                                                                                                                                                                                                                                                                                                                                                                                |
| 5  |                      |        |                                                                                                                                                                                                                                                                                                                                                                                |
| 6  | Eligibility criteria | 10 P8  | Inclusion and exclusion criteria for participants. If applicable, eligibility criteria for study centres and individuals who will perform the interventions (eg, surgeons, psychotherapists)                                                                                                                                                                                   |
| 7  |                      |        |                                                                                                                                                                                                                                                                                                                                                                                |
| 8  |                      |        |                                                                                                                                                                                                                                                                                                                                                                                |
| 9  |                      |        |                                                                                                                                                                                                                                                                                                                                                                                |
| 10 | Interventions        | 11a P9 | Interventions for each group with sufficient detail to allow replication, including how and when they will be administered                                                                                                                                                                                                                                                     |
| 11 |                      |        |                                                                                                                                                                                                                                                                                                                                                                                |
| 12 |                      |        |                                                                                                                                                                                                                                                                                                                                                                                |
| 13 |                      |        |                                                                                                                                                                                                                                                                                                                                                                                |
| 14 |                      | 11b NA | Criteria for discontinuing or modifying allocated interventions for a given trial participant (eg, drug dose change in response to harms, participant request, or improving/worsening disease)                                                                                                                                                                                 |
| 15 |                      |        |                                                                                                                                                                                                                                                                                                                                                                                |
| 16 |                      |        |                                                                                                                                                                                                                                                                                                                                                                                |
| 17 |                      |        |                                                                                                                                                                                                                                                                                                                                                                                |
| 18 |                      | 11c NA | Strategies to improve adherence to intervention protocols, and any procedures for monitoring adherence (eg, drug tablet return, laboratory tests)                                                                                                                                                                                                                              |
| 19 |                      |        |                                                                                                                                                                                                                                                                                                                                                                                |
| 20 |                      |        |                                                                                                                                                                                                                                                                                                                                                                                |
| 21 |                      | 11d 10 | Relevant concomitant care and interventions that are permitted or prohibited during the trial                                                                                                                                                                                                                                                                                  |
| 22 |                      |        |                                                                                                                                                                                                                                                                                                                                                                                |
| 23 |                      |        |                                                                                                                                                                                                                                                                                                                                                                                |
| 24 | Outcomes             | 12 P10 | Primary, secondary, and other outcomes, including the specific measurement variable (eg, systolic blood pressure), analysis metric (eg, change from baseline, final value, time to event), method of aggregation (eg, median, proportion), and time point for each outcome. Explanation of the clinical relevance of chosen efficacy and harm outcomes is strongly recommended |
| 25 |                      |        |                                                                                                                                                                                                                                                                                                                                                                                |
| 26 |                      |        |                                                                                                                                                                                                                                                                                                                                                                                |
| 27 |                      |        |                                                                                                                                                                                                                                                                                                                                                                                |
| 28 |                      |        |                                                                                                                                                                                                                                                                                                                                                                                |
| 29 |                      |        |                                                                                                                                                                                                                                                                                                                                                                                |
| 30 |                      |        |                                                                                                                                                                                                                                                                                                                                                                                |
| 31 | Participant timeline | 13 P17 | Time schedule of enrolment, interventions (including any run-ins and washouts), assessments, and visits for participants. A schematic diagram is highly recommended (see Figure)                                                                                                                                                                                               |
| 32 |                      |        |                                                                                                                                                                                                                                                                                                                                                                                |
| 33 |                      |        |                                                                                                                                                                                                                                                                                                                                                                                |
| 34 |                      |        |                                                                                                                                                                                                                                                                                                                                                                                |
| 35 |                      |        |                                                                                                                                                                                                                                                                                                                                                                                |
| 36 | Sample size          | 14 P11 | Estimated number of participants needed to achieve study objectives and how it was determined, including clinical and statistical assumptions supporting any sample size calculations                                                                                                                                                                                          |
| 37 |                      |        |                                                                                                                                                                                                                                                                                                                                                                                |
| 38 |                      |        |                                                                                                                                                                                                                                                                                                                                                                                |
| 39 |                      |        |                                                                                                                                                                                                                                                                                                                                                                                |
| 40 | Recruitment          | 15 P8  | Strategies for achieving adequate participant enrolment to reach target sample size                                                                                                                                                                                                                                                                                            |
| 41 |                      |        |                                                                                                                                                                                                                                                                                                                                                                                |
| 42 |                      |        |                                                                                                                                                                                                                                                                                                                                                                                |
| 43 |                      |        |                                                                                                                                                                                                                                                                                                                                                                                |

### Methods: Assignment of interventions (for controlled trials)

#### Allocation:

|    |                                  |        |                                                                                                                                                                                                                                                                                                                                                          |
|----|----------------------------------|--------|----------------------------------------------------------------------------------------------------------------------------------------------------------------------------------------------------------------------------------------------------------------------------------------------------------------------------------------------------------|
| 47 |                                  |        |                                                                                                                                                                                                                                                                                                                                                          |
| 48 | Sequence generation              | 16a P9 | Method of generating the allocation sequence (eg, computer-generated random numbers), and list of any factors for stratification. To reduce predictability of a random sequence, details of any planned restriction (eg, blocking) should be provided in a separate document that is unavailable to those who enrol participants or assign interventions |
| 49 |                                  |        |                                                                                                                                                                                                                                                                                                                                                          |
| 50 |                                  |        |                                                                                                                                                                                                                                                                                                                                                          |
| 51 |                                  |        |                                                                                                                                                                                                                                                                                                                                                          |
| 52 |                                  |        |                                                                                                                                                                                                                                                                                                                                                          |
| 53 |                                  |        |                                                                                                                                                                                                                                                                                                                                                          |
| 54 | Allocation concealment mechanism | 16b P8 | Mechanism of implementing the allocation sequence (eg, central telephone; sequentially numbered, opaque, sealed envelopes), describing any steps to conceal the sequence until interventions are assigned                                                                                                                                                |
| 55 |                                  |        |                                                                                                                                                                                                                                                                                                                                                          |
| 56 |                                  |        |                                                                                                                                                                                                                                                                                                                                                          |
| 57 |                                  |        |                                                                                                                                                                                                                                                                                                                                                          |
| 58 |                                  |        |                                                                                                                                                                                                                                                                                                                                                          |
| 59 |                                  |        |                                                                                                                                                                                                                                                                                                                                                          |
| 60 |                                  |        |                                                                                                                                                                                                                                                                                                                                                          |



- 1  
2 Implementation 16c P8 Who will generate the allocation sequence, who will enrol participants, and  
3 who will assign participants to interventions  
4  
5 Blinding 17a P8 Who will be blinded after assignment to interventions (eg, trial participants,  
6 (masking) care providers, outcome assessors, data analysts), and how  
7  
8 17b NA If blinded, circumstances under which unblinding is permissible, and  
9 procedure for revealing a participant's allocated intervention during the trial  
10

### 11 **Methods: Data collection, management, and analysis**

- 12  
13 Data collection 18a P9 Plans for assessment and collection of outcome, baseline, and other trial  
14 methods data, including any related processes to promote data quality (eg, duplicate  
15 measurements, training of assessors) and a description of study instruments  
16 (eg, questionnaires, laboratory tests) along with their reliability and validity, if  
17 known. Reference to where data collection forms can be found, if not in the  
18 protocol  
19  
20 18b NA Plans to promote participant retention and complete follow-up, including list  
21 of any outcome data to be collected for participants who discontinue or  
22 deviate from intervention protocols  
23  
24 Data 19 NA Plans for data entry, coding, security, and storage, including any related  
25 management processes to promote data quality (eg, double data entry; range checks for  
26 data values). Reference to where details of data management procedures  
27 can be found, if not in the protocol  
28  
29 Statistical 20a Statistical methods for analysing primary and secondary outcomes.  
30 methods P11 Reference to where other details of the statistical analysis plan can be found,  
31 if not in the protocol  
32  
33 20b Methods for any additional analyses (eg, subgroup and adjusted analyses)  
34 P11  
35  
36 20c NA Definition of analysis population relating to protocol non-adherence (eg, as  
37 randomised analysis), and any statistical methods to handle missing data  
38 (eg, multiple imputation)  
39  
40  
41  
42  
43

### 44 **Methods: Monitoring**

- 45  
46 Data monitoring 21a NA Composition of data monitoring committee (DMC); summary of its role and  
47 reporting structure; statement of whether it is independent from the sponsor  
48 and competing interests; and reference to where further details about its  
49 charter can be found, if not in the protocol. Alternatively, an explanation of  
50 why a DMC is not needed  
51  
52 21b Description of any interim analyses and stopping guidelines, including who  
53 will have access to these interim results and make the final decision to  
54 terminate the trial  
55 P12  
56  
57 Harms 22 P10 Plans for collecting, assessing, reporting, and managing solicited and  
58 spontaneously reported adverse events and other unintended effects of trial  
59 interventions or trial conduct  
60

|    |                                 |        |                                                                                   |
|----|---------------------------------|--------|-----------------------------------------------------------------------------------|
| 1  |                                 |        |                                                                                   |
| 2  | Auditing                        | 23 NA  | Frequency and procedures for auditing trial conduct, if any, and whether the      |
| 3  |                                 |        | process will be independent from investigators and the sponsor                    |
| 4  |                                 |        |                                                                                   |
| 5  | <b>Ethics and dissemination</b> |        |                                                                                   |
| 6  |                                 |        |                                                                                   |
| 7  | Research ethics                 | 24 P12 | Plans for seeking research ethics committee/institutional review board            |
| 8  | approval                        |        | (REC/IRB) approval                                                                |
| 9  |                                 |        |                                                                                   |
| 10 | Protocol                        | 25 NA  | Plans for communicating important protocol modifications (eg, changes to          |
| 11 | amendments                      |        | eligibility criteria, outcomes, analyses) to relevant parties (eg, investigators, |
| 12 |                                 |        | REC/IRBs, trial participants, trial registries, journals, regulators)             |
| 13 |                                 |        |                                                                                   |
| 14 | Consent or assent               | 26a    | Who will obtain informed consent or assent from potential trial participants or   |
| 15 |                                 | P12    | authorised surrogates, and how (see Item 32)                                      |
| 16 |                                 |        |                                                                                   |
| 17 |                                 | 26b NA | Additional consent provisions for collection and use of participant data and      |
| 18 |                                 |        | biological specimens in ancillary studies, if applicable                          |
| 19 |                                 |        |                                                                                   |
| 20 | Confidentiality                 | 27 P12 | How personal information about potential and enrolled participants will be        |
| 21 |                                 |        | collected, shared, and maintained in order to protect confidentiality before,     |
| 22 |                                 |        | during, and after the trial                                                       |
| 23 |                                 |        |                                                                                   |
| 24 | Declaration of                  | 28 P14 | Financial and other competing interests for principal investigators for the       |
| 25 | interests                       |        | overall trial and each study site                                                 |
| 26 |                                 |        |                                                                                   |
| 27 | Access to data                  | 29 P12 | Statement of who will have access to the final trial dataset, and disclosure of   |
| 28 |                                 |        | contractual agreements that limit such access for investigators                   |
| 29 |                                 |        |                                                                                   |
| 30 | Ancillary and                   | 30 P10 | Provisions, if any, for ancillary and post-trial care, and for compensation to    |
| 31 | post-trial care                 |        | those who suffer harm from trial participation                                    |
| 32 |                                 |        |                                                                                   |
| 33 | Dissemination                   | 31a    | Plans for investigators and sponsor to communicate trial results to               |
| 34 | policy                          | P12    | participants, healthcare professionals, the public, and other relevant groups     |
| 35 |                                 |        | (eg, via publication, reporting in results databases, or other data sharing       |
| 36 |                                 |        | arrangements), including any publication restrictions                             |
| 37 |                                 |        |                                                                                   |
| 38 |                                 | 31b NA | Authorship eligibility guidelines and any intended use of professional writers    |
| 39 |                                 |        |                                                                                   |
| 40 |                                 | 31c NA | Plans, if any, for granting public access to the full protocol, participant-level |
| 41 |                                 |        | dataset, and statistical code                                                     |
| 42 |                                 |        |                                                                                   |
| 43 |                                 |        |                                                                                   |
| 44 |                                 |        |                                                                                   |
| 45 |                                 |        |                                                                                   |
| 46 | <b>Appendices</b>               |        |                                                                                   |
| 47 |                                 |        |                                                                                   |
| 48 | Informed consent                | 32 NA  | Model consent form and other related documentation given to participants          |
| 49 | materials                       |        | and authorised surrogates                                                         |
| 50 |                                 |        |                                                                                   |
| 51 | Biological                      | 33 NA  | Plans for collection, laboratory evaluation, and storage of biological            |
| 52 | specimens                       |        | specimens for genetic or molecular analysis in the current trial and for future   |
| 53 |                                 |        | use in ancillary studies, if applicable                                           |
| 54 |                                 |        |                                                                                   |

\*It is strongly recommended that this checklist be read in conjunction with the SPIRIT 2013 Explanation & Elaboration for important clarification on the items. Amendments to the protocol should be tracked and dated. The SPIRIT checklist is copyrighted by the SPIRIT Group under the Creative Commons "[Attribution-NonCommercial-NoDerivs 3.0 Unported](https://creativecommons.org/licenses/by-nc-nd/3.0/)" license.
